# Supplementary material for: Induction of Antibacterial Metabolites by Co-Cultivation of Two Red-Sea-Sponge-Associated Actinomycetes Micromonospora sp. UR56 and Actinokinespora sp. EG49
Source: PubMed Central journal article supplement (PMC7281614; doi:10.3390/md18050243), 2020-05-05
Supplement: marinedrugs-18-00243-s001.pdf [file marinedrugs-18-00243-s001.pdf]

## **Supplementary Material**

### **Induction of Antibacterial Metabolites by Co-Cultivation of Two Red-Sea-Sponge-Associated Actinomycetes *Micromonospora* sp. UR56 and *Actinokinespora* sp. EG49**

Mohamed S. Hifnawy<sup>1§</sup>, Hossam M. Hassan<sup>2§</sup>, Rabab Mohammed<sup>2</sup>, Mohamed M. Fouda<sup>3</sup>, Ahmed M. Sayed<sup>3</sup>, Ahmed A. Hamed<sup>4</sup>, Sameh F. AbouZid<sup>2</sup>, Mostafa E. Rateb<sup>5</sup>, Hani A. Alhadrami<sup>6,7,\*</sup> and Usama Ramadan Abdelmohsen<sup>8,9\*</sup>.

<sup>1</sup>*Department of Pharmacognosy, Faculty of Pharmacy, Cairo University, Cairo, Egypt 11787,*

<sup>2</sup>*Department of Pharmacognosy, Faculty of Pharmacy, Beni-Suef University, Beni-Suef, Egypt 62514,*

<sup>3</sup>*Department of Pharmacognosy, Faculty of Pharmacy, Nahda University, Beni-Suef, Egypt 62513,*

<sup>4</sup>*Microbial Chemistry Department, National Research Center, 33 El-Buhouth Street, 12622, Giza, Egypt,*

<sup>5</sup>*School of Computing, Engineering & Physical Sciences, University of the West of Scotland, Paisley PA1 2BE, UK,*

<sup>6</sup>*Department of Medical Laboratory Technology, Faculty of Applied Medical Sciences, King Abdulaziz University, Jeddah, 21589, Saudi Arabia,*

<sup>7</sup>*King Fahd Medical Research Centre, King Abdulaziz University, Jeddah, 21589, Saudi Arabia*

<sup>8</sup>*Department of Pharmacognosy, Faculty of Pharmacy, Minia University, 61519 Minia, Egypt,*

<sup>9</sup>*Department of Pharmacognosy, Faculty of Pharmacy, Deraya University, Universities Zone, P.O. Box 61111 New Minia City, 61519 Minia.*

\*Correspondence: [usama.ramadan@mu.edu.eg](mailto:usama.ramadan@mu.edu.eg) (URA) and [hani.alhadrami@kau.edu.sa](mailto:hani.alhadrami@kau.edu.sa) (HAA).

§Equal contributions: Mohamed S. Hifnawy and Hossam M. Hassan as first authors

**Table S1.** The dereplication results of the ethyl acetate fraction of micromonospora UR 56.

**Table S2.** The dereplication results of the ethyl acetate fraction of Actinokinospora EG49.

**Table S3.** The dereplication results of the ethyl acetate fraction of co-culture.

**Figure S1:**  $^1\text{H-NMR}$  Spectrum of compound 1 (dimethyl phenazine-1,6-dicarboxylate)( $\text{CDCl}_3$ ).

**Figure S2:** Expanded  $^1\text{H-NMR}$  Spectrum of compound 1 (dimethyl phenazine-1,6-dicarboxylate)( $\text{CDCl}_3$ ).

**Figure S3:**  $^1\text{H-}^1\text{H-COSY}$  Spectrum of compound 1 (dimethyl phenazine-1,6-dicarboxylate)( $\text{CDCl}_3$ ).

**Figure S4:** HSQC Spectrum of compound 1 (dimethyl phenazine-1,6-dicarboxylate)( $\text{CDCl}_3$ ).

**Figure S5:** HMBC Spectrum of compound 1 (dimethyl phenazine-1,6-dicarboxylate) ( $\text{CDCl}_3$ )

**Figure S6:** HRESIMS of compound 1 (dimethyl phenazine-1,6-dicarboxylate).

**Figure S7:**  $^1\text{H-NMR}$  Spectrum of compound 2 (phencomycin)( $\text{CDCl}_3$ ).

**Figure S8:** Expanded  $^1\text{H-NMR}$  Spectrum of compound 2 (phencomycin)( $\text{CDCl}_3$ ).

**Figure S9:**  $^{13}\text{C-NMR}$  spectrum of compound 2 (phencomycin)( $\text{CDCl}_3$ ).

**Figure S10:**  $^1\text{H-}^1\text{H-COSY}$  Spectrum of compound 2 (phencomycin)( $\text{CDCl}_3$ ).

**Figure S11:** HSQC Spectrum of compound 2 (phencomycin)( $\text{CDCl}_3$ ).

**Figure S12:** HMBC Spectrum of compound 2 (phencomycin)( $\text{CDCl}_3$ ).

**Figure S13:** HRESIMS of compound 2 (phencomycin).

**Figure S14:**  $^1\text{H-NMR}$  Spectrum of compound 3 (Phenazine -1-carboxylic acid)( $\text{CDCl}_3$ ).

**Figure S15:** Expanded  $^1\text{H-NMR}$  Spectrum of compound 3 (Phenazine -1-carboxylic acid)( $\text{CDCl}_3$ ).

**Figure S16:**  $^{13}\text{C-NMR}$  spectrum of compound 3 (Phenazine -1-carboxylic acid) ( $\text{CDCl}_3$ ).

**Figure S17:**  $^1\text{H-}^1\text{H-COSY}$  Spectrum of compound 3 (Phenazine -1-carboxylic acid) ( $\text{CDCl}_3$ ).

**Figure S18:** HSQC Spectrum of compound 3 (Phenazine -1-carboxylic acid)( $\text{CDCl}_3$ ).

**Figure S19:** HRESIMS of compound 3 (Phenazine -1-carboxylic acid).

**Figure S20:**  $^1\text{H-NMR}$  Spectrum of compound 11 (N-(2-hydroxyphenyl)-acetamide)(MeOD).

**Figure S21:** Expanded  $^1\text{H-NMR}$  Spectrum of compound 11 (N-(2-hydroxyphenyl)-acetamide) (MeOD).

**Figure S22:** Expanded  $^1\text{H-NMR}$  Spectrum of compound 11 (N-(2-hydroxyphenyl)-acetamide) (MeOD).

**Figure S23:**  $^{13}\text{C-NMR}$  spectrum of compound 11 (N-(2-hydroxyphenyl)-acetamide)(MeOD).

**Figure S24:**  $^1\text{H}$ - $^1\text{H}$ COSY Spectrum of compound **11** (N-(2-hydroxyphenyl)-acetamide)(MeOD).

**Figure S25:** HSQC Spectrum of compound **11**(N-(2-hydroxyphenyl)-acetamide)(MeOD).

**Figure S26:** HMBC Spectrum of compound **11**(N-(2-hydroxyphenyl)-acetamide)(MeOD).

**FigureS27:** HRESIMS of compound **11** (N-(2-hydroxyphenyl)-acetamide)(MeOD).

**Figure S28:** $^1\text{H}$ -NMR Spectrum of compound **12** (P-anisamide)( $\text{CDCl}_3$ ).

**Figure S29:** DEPTQ spectrum of compound **12**(p-anisamide)( $\text{CDCl}_3$ ) .

**Figure S30:** Dereplicated metabolites from metabolomic analysis of *Micromonospora* sp UR 56.

**Figure S31:** Dereplicated metabolites from metabolomic analysis of *Actinokineospora* sp. *EG49*.

**Figure S32.** Dereplicated metabolites from metabolomic analysis of **co-culture** *Micromonospora* sp. UR 56 and *Actinokineospora* sp. *EG49*.

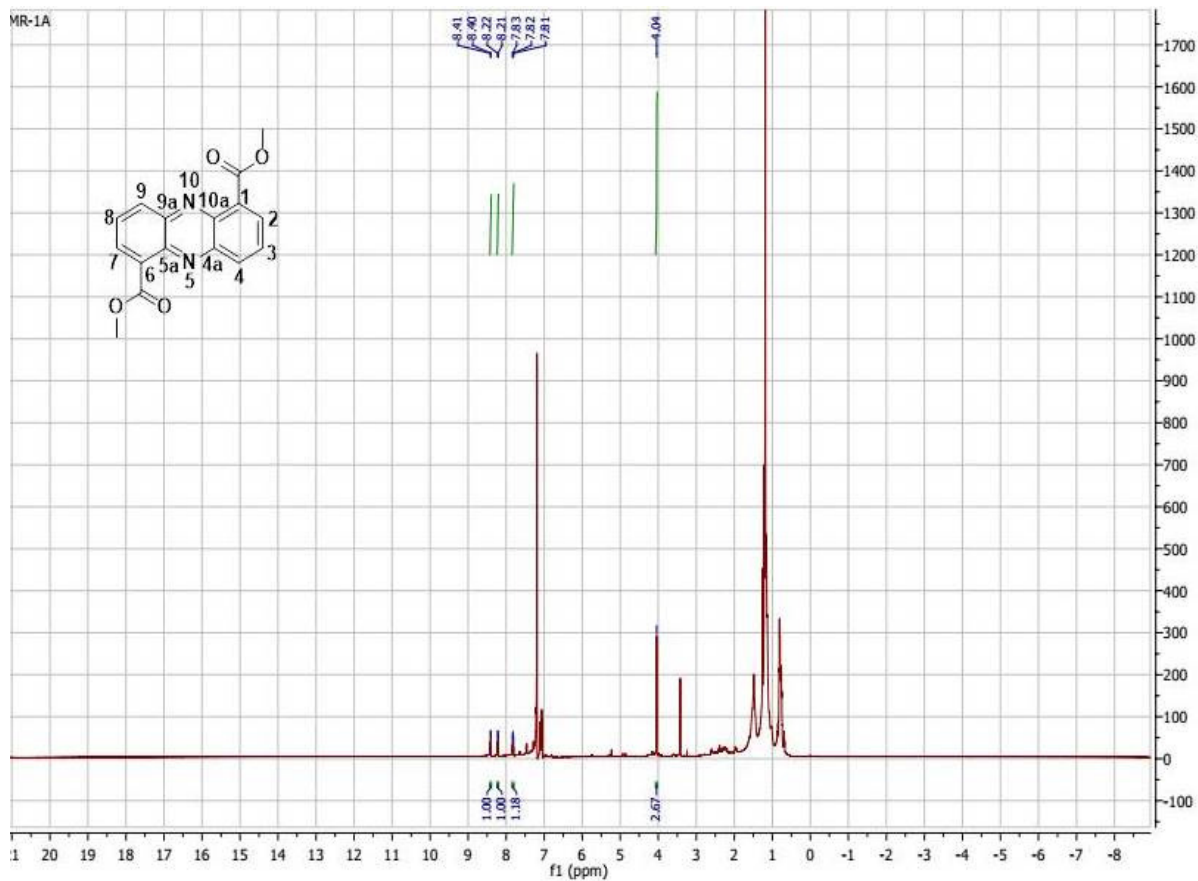

Figure S1:  $^1\text{H-NMR}$  Spectrum of compound 1 (dimethyl phenazine-1,6-dicarboxylate)(CDCl<sub>3</sub>).

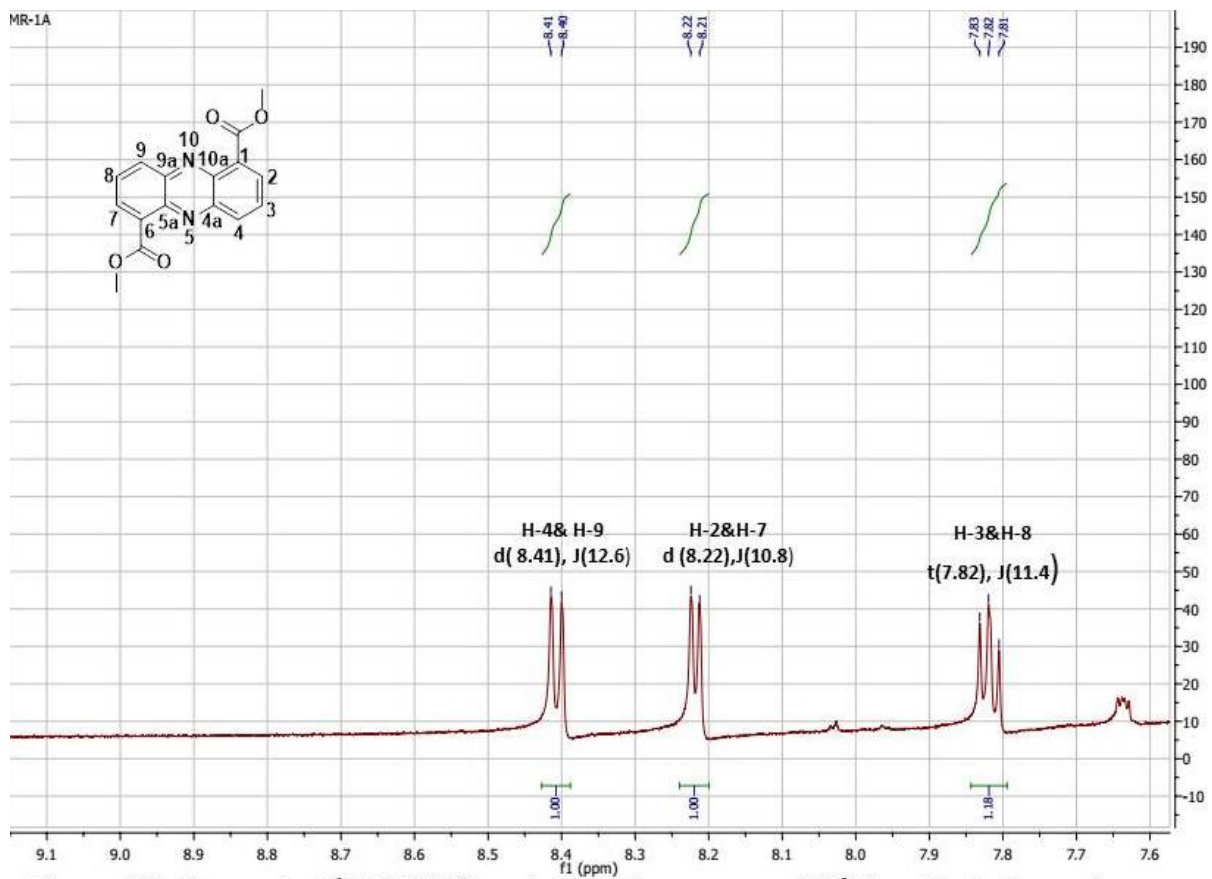

Figure S2: Expanded  $^1\text{H}$ -NMR Spectrum of compound 1 (dimethyl phenazine-1,6-dicarboxylate)( $\text{CDCl}_3$ ).

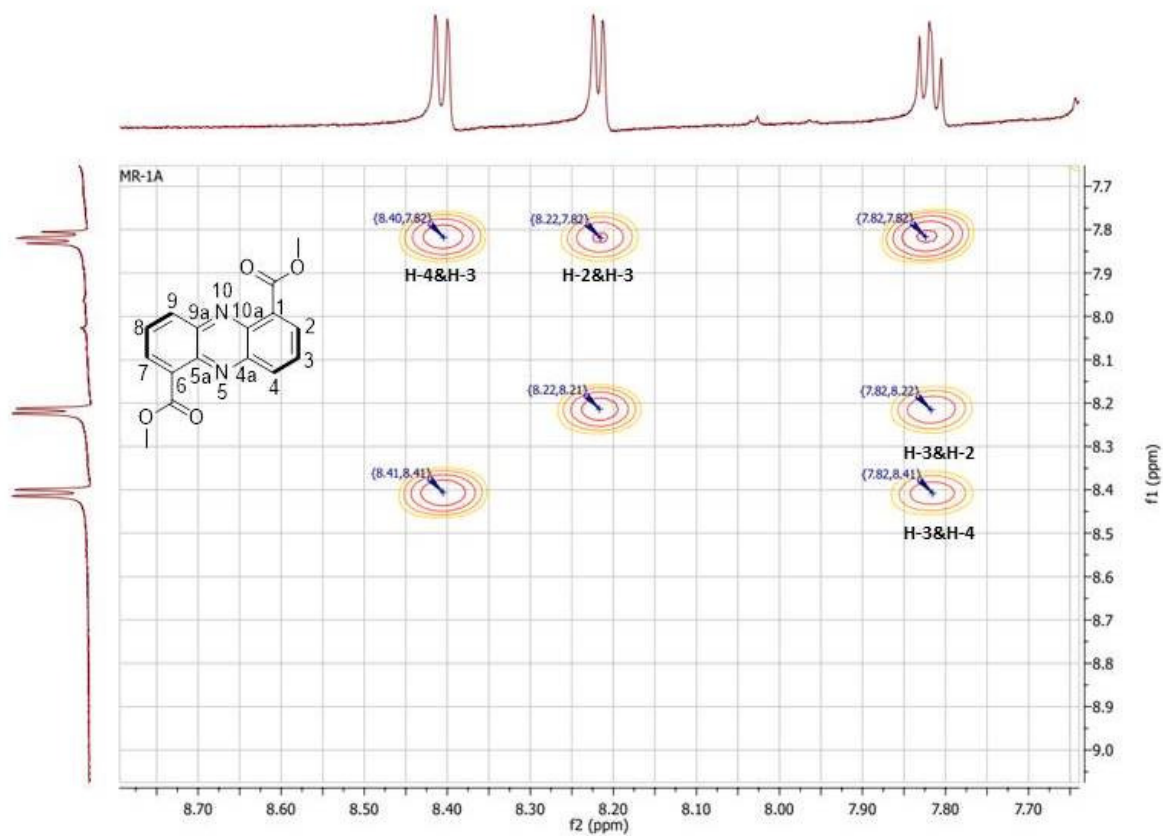

**Figure S3:  $^1\text{H}$ - $^1\text{H}$  COSY Spectrum of compound 1 (dimethyl phenazine-1,6-dicarboxylate)( $\text{CDCl}_3$ ).**

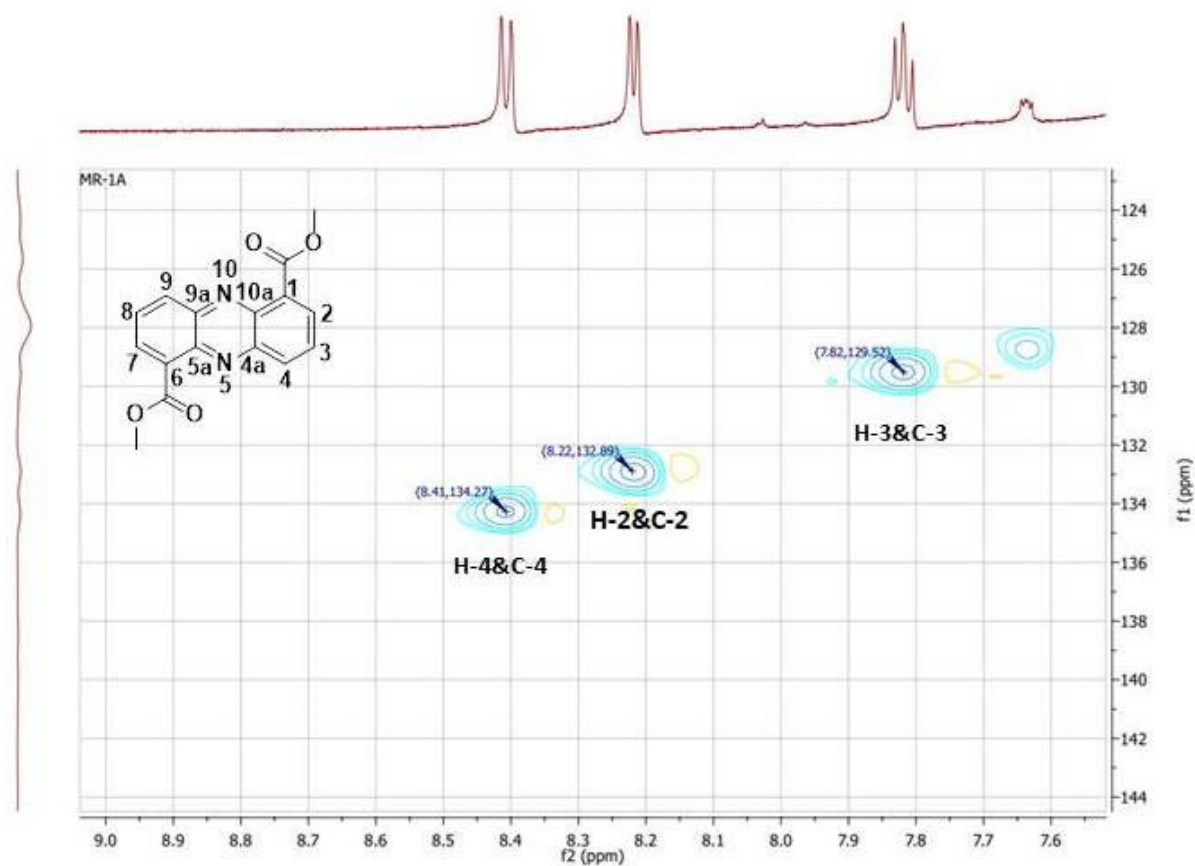

**Figure S4: HSQC Spectrum of compound 1 (dimethyl phenazine-1,6-dicarboxylate)(CDCl<sub>3</sub>).**

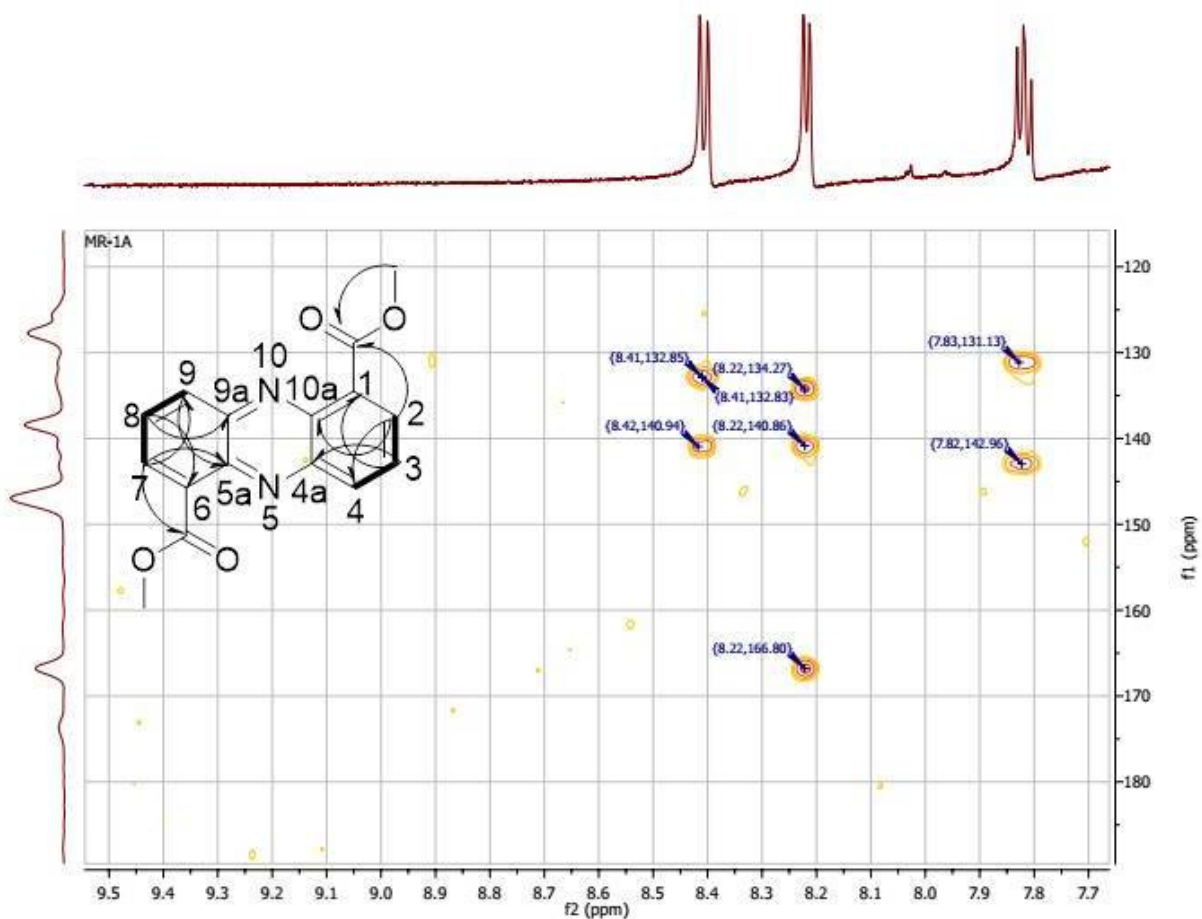

**Figure S5: HMBC Spectrum of compound 1 (dimethyl phenazine-1,6-dicarboxylate (CDCl<sub>3</sub>))**



MR758\_1A#232-253 RT: 9.64-10.29 AV: 11 NL: 8.50E6  
F: FTMS + p.ESI Fullms [100.00-2000.00]

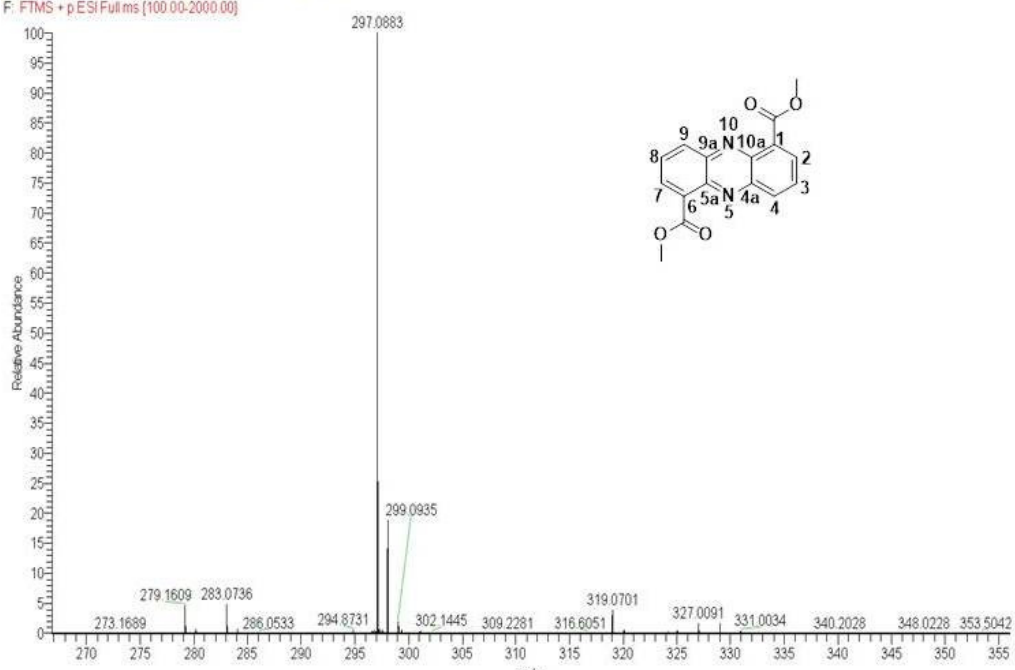

**FigureS6: HRESIMS of compound 1 (dimethyl phenazine-1,6-dicarboxylate).**

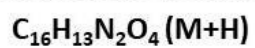

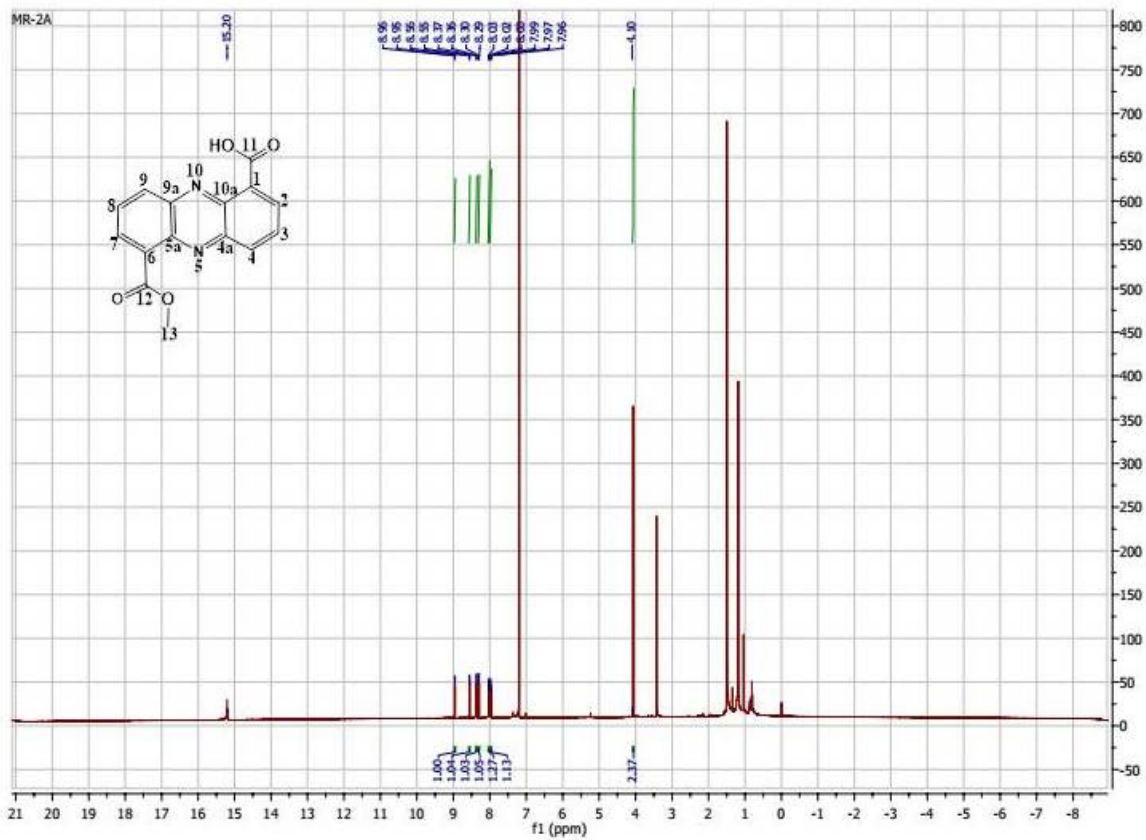

Figure S7: <sup>1</sup>H-NMR Spectrum of compound 2 (phencomycin)(CDCl<sub>3</sub>).

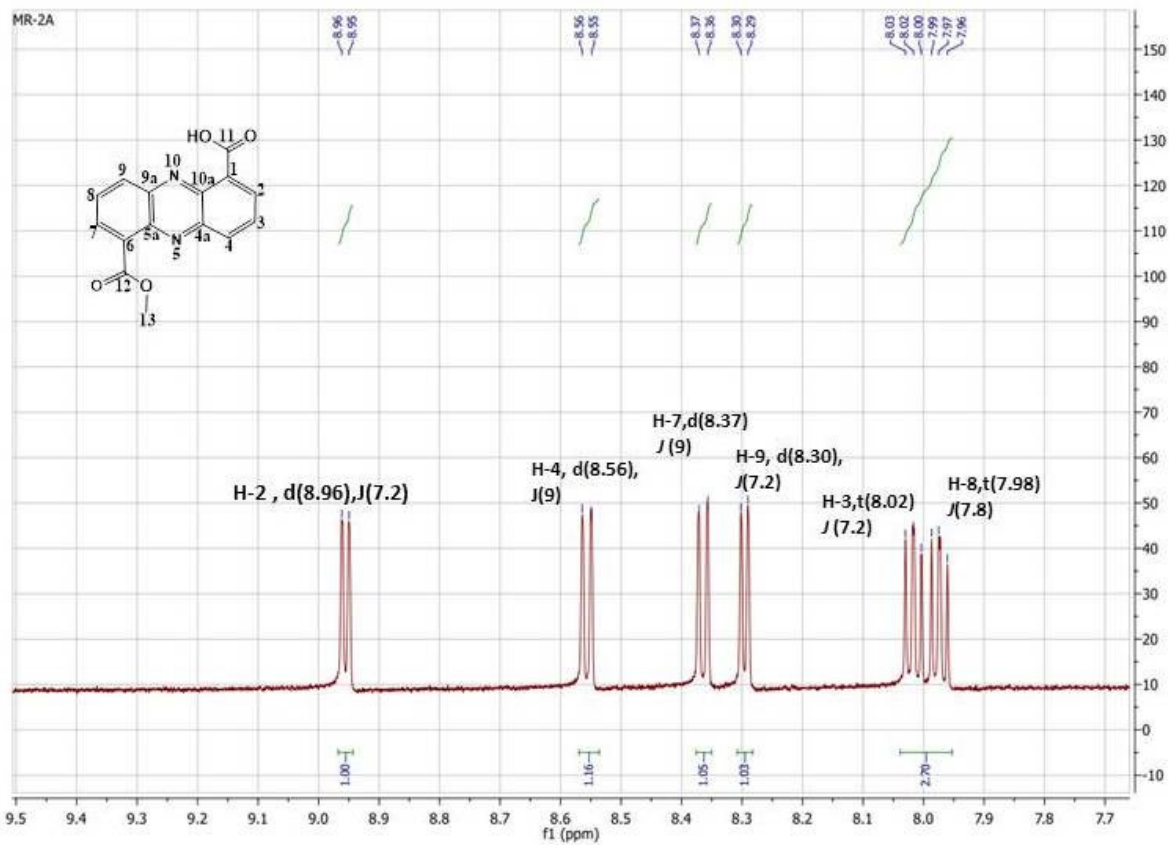

**Figure S8: Expanded  $^1\text{H}$ -NMR Spectrum of compound 2 (phencomycin)( $\text{CDCl}_3$ ).**

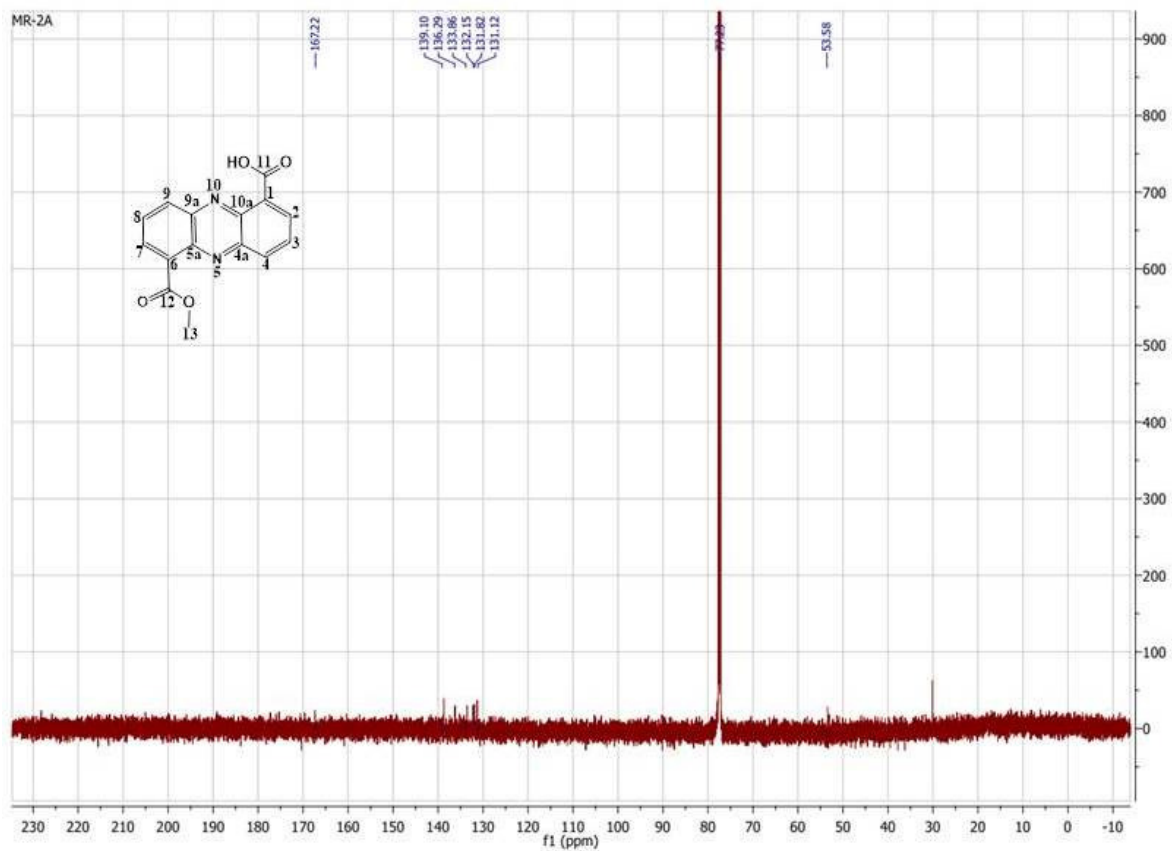

Figure S9:  $^{13}\text{C}$ -NMR spectrum of compound 2 (phencomycin)( $\text{CDCl}_3$ ).

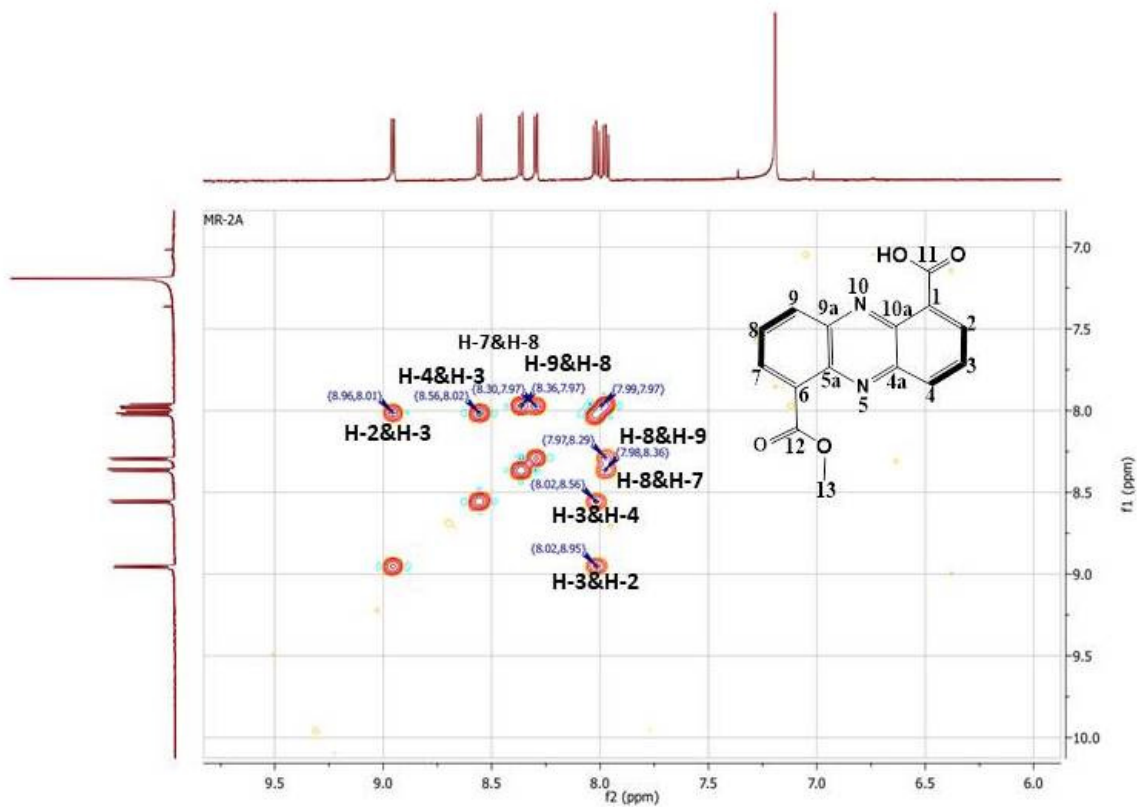

Figure S10:  $^1\text{H}$ - $^1\text{H}$  COSY Spectrum of compound 2 (phencomycin)( $\text{CDCl}_3$ ).

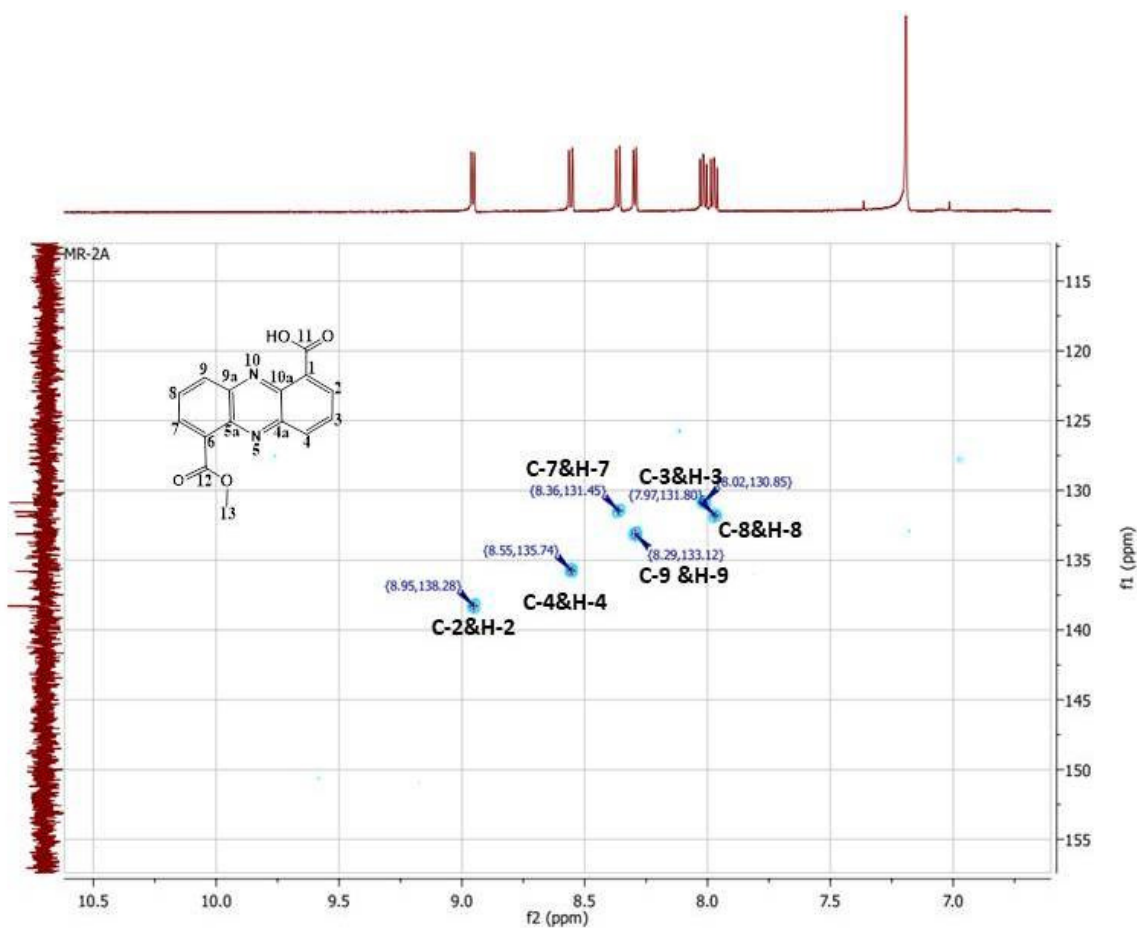

Figure S11: HSQC Spectrum of compound 2 (phencomycin)( $\text{CDCl}_3$ ).

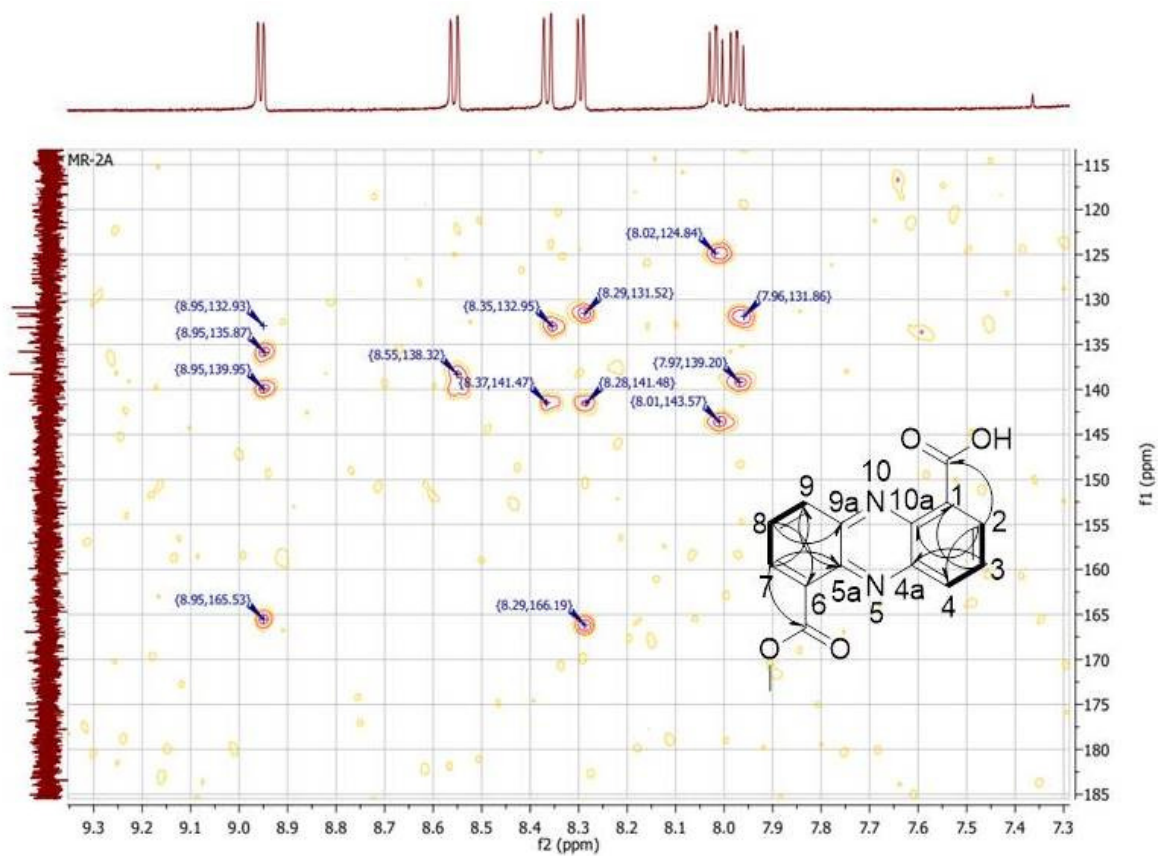

FigureS12: HMBC Spectrum of compound 2 (phencomycin)

MR759\_2A#214-232 RT: 8.94-9.50 AV: 10 NL: 7.80E6  
F: FTMS + pESI Fullms [100.00-2000.00]

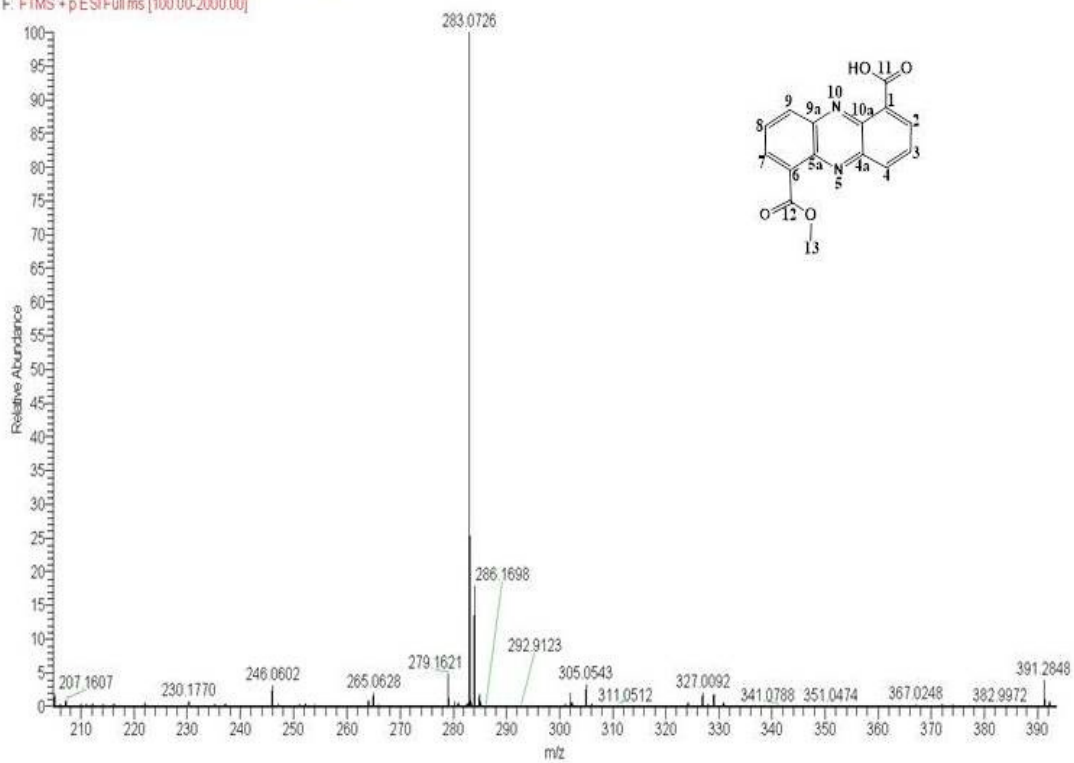

**FigureS13: HRESIMS of compound 2 (phencomycin)**

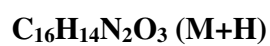



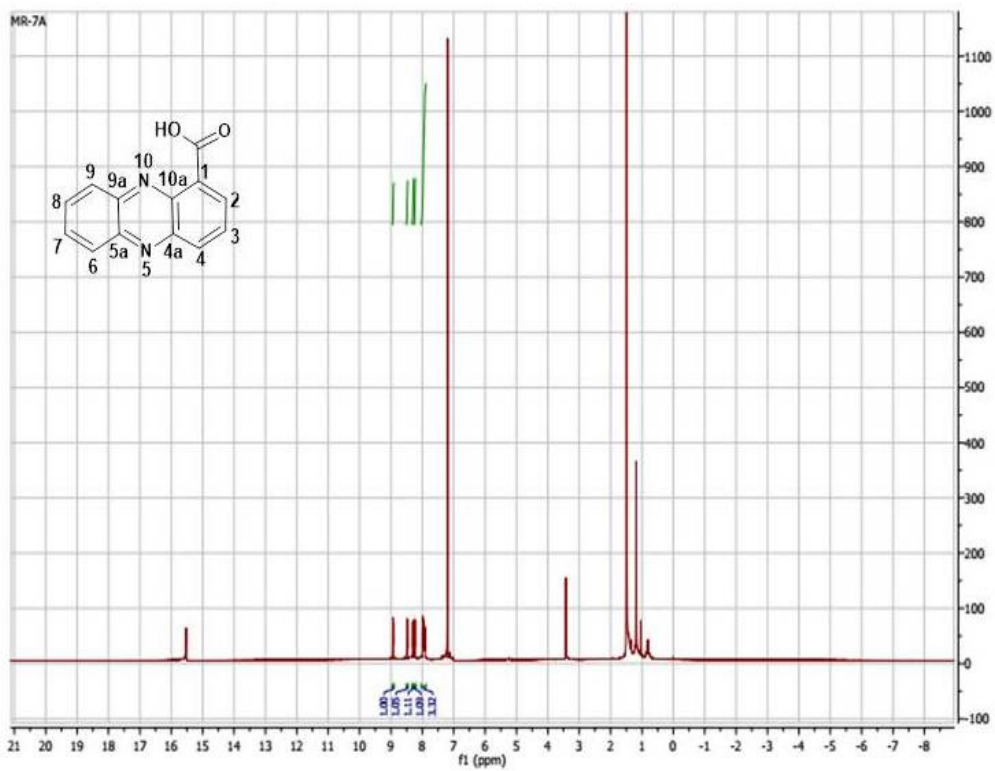

Figure S14:  $^1\text{H}$ -NMR Spectrum of compound 3 (Phenazine -1-carboxylic acid) ( $\text{CDCl}_3$ ).

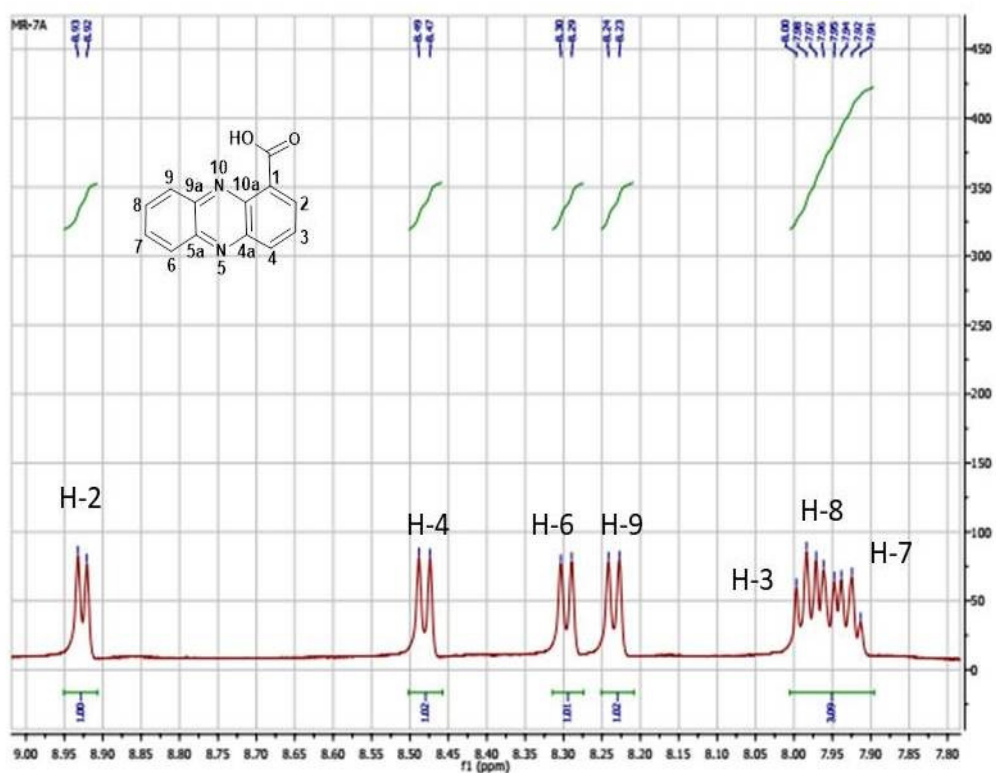

Figure S15: Expanded <sup>1</sup>H-NMR Spectrum of compound 3 (Phenazine-1-carboxylic acid) (CDCl<sub>3</sub>).

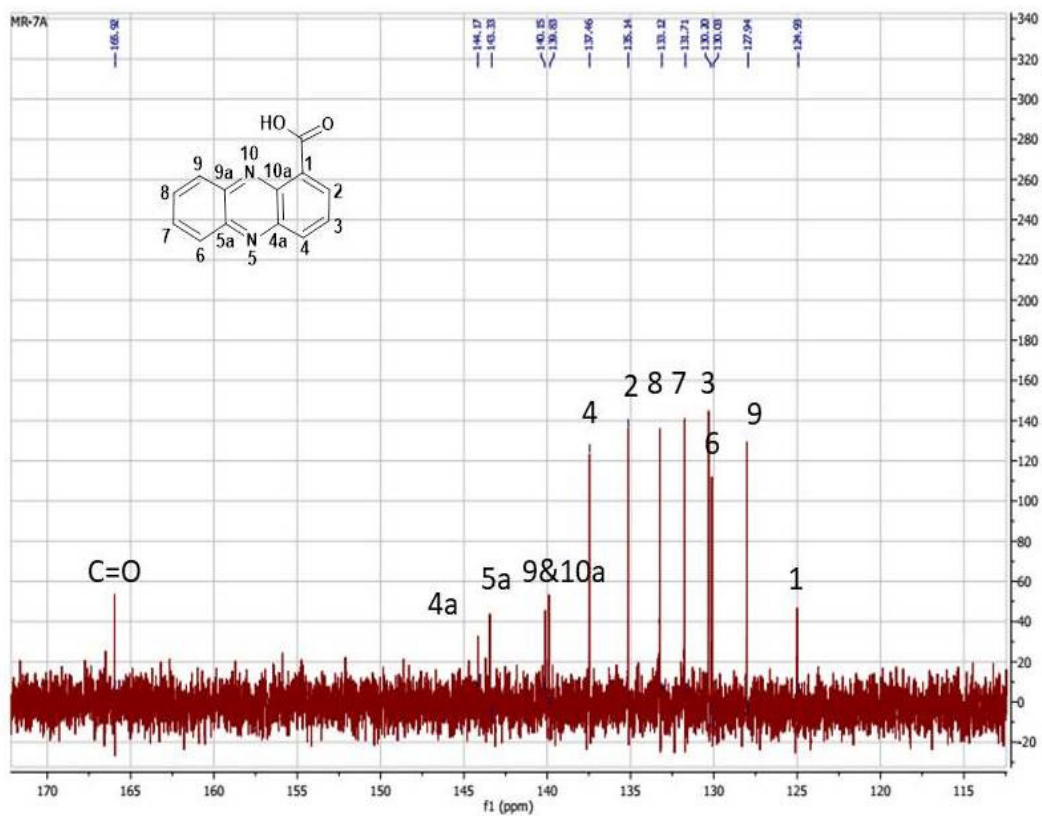

Figure S16: <sup>13</sup>C-NMR spectrum of compound 3 (Phenazine-1-carboxylic acid) (CDCl<sub>3</sub>).

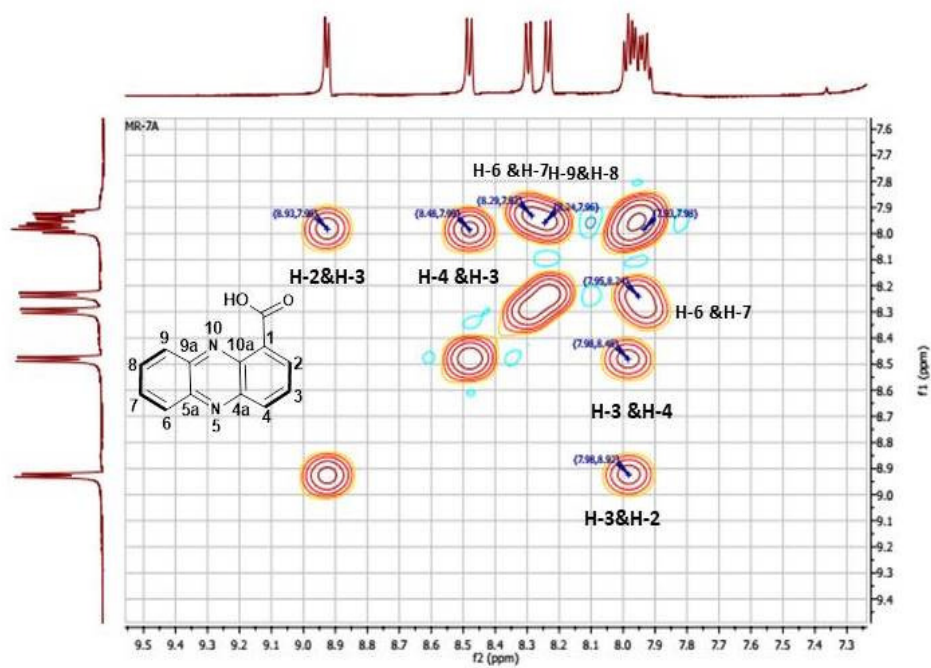

Figure S17:  $^1\text{H}$ - $^1\text{H}$  COSY Spectrum of compound 3 (Phenazine -1-carboxylic acid) ( $\text{CDCl}_3$ ).

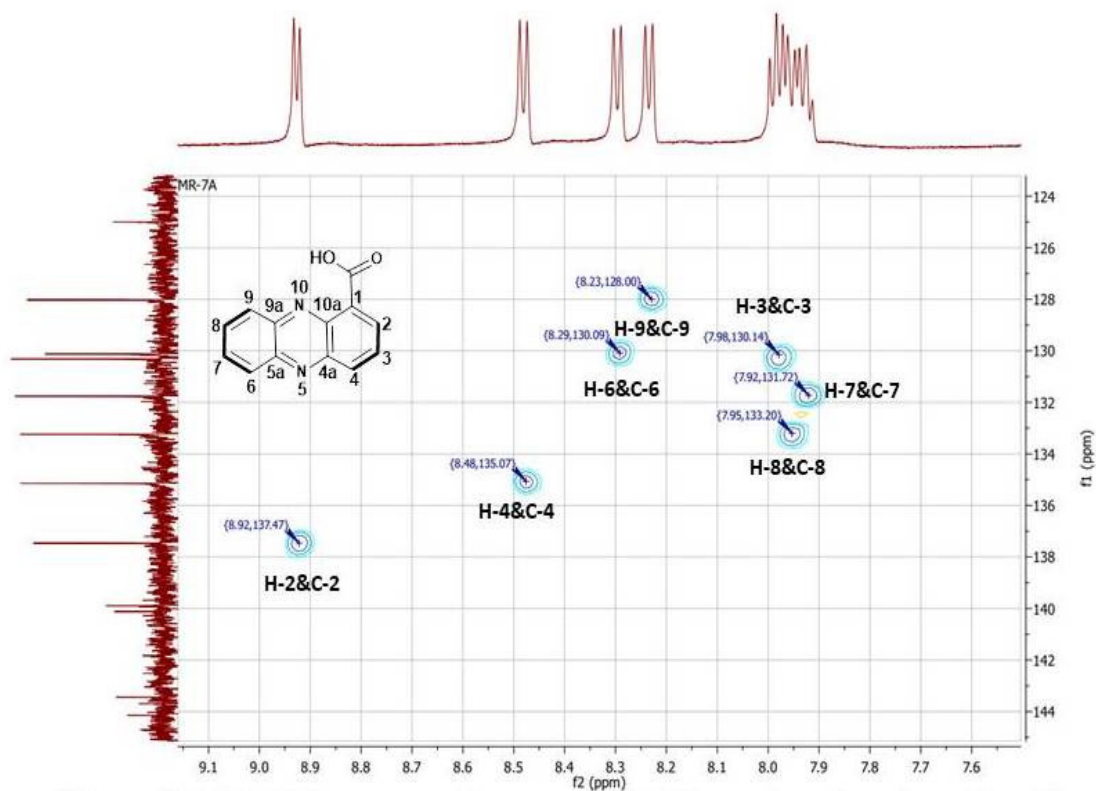

Figure S18: HSQC Spectrum of compound 3 (Phenazine -1-carboxylic acid) (CDCl<sub>3</sub>).

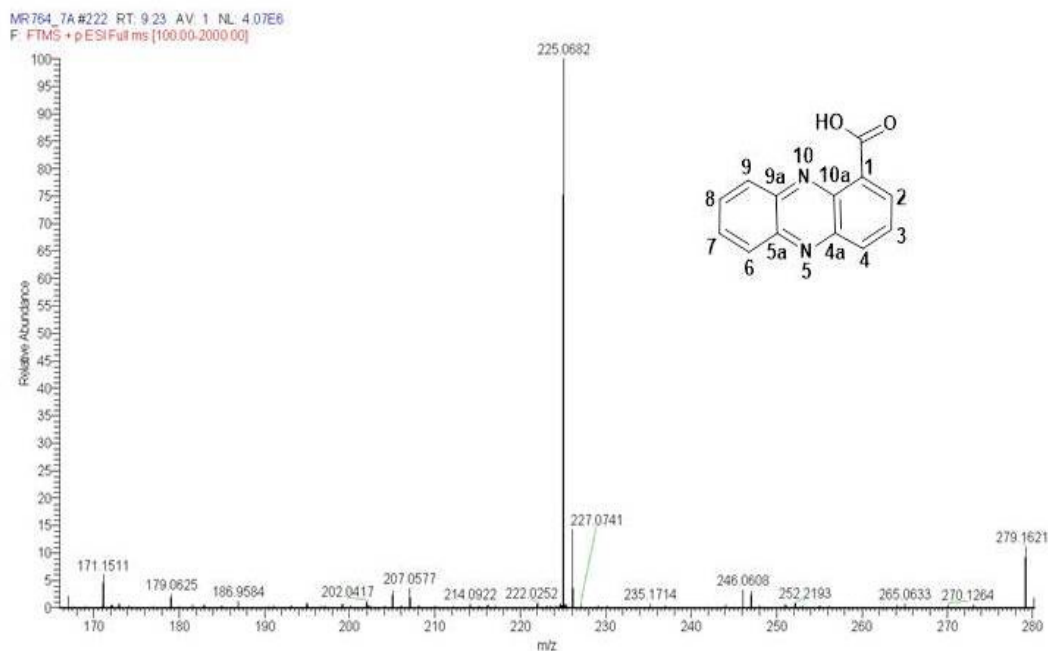

FigureS19: HRESIMS of compound 3(Phenazine -1-carboxylic acid).

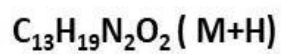

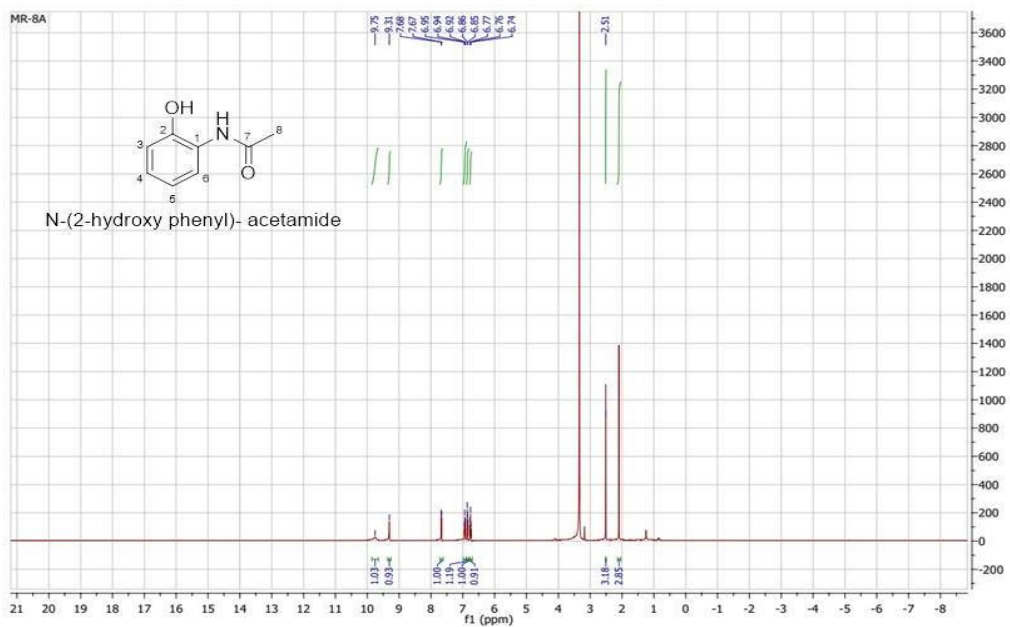

Figure S20:  $^1\text{H-NMR}$  Spectrum of compound **1 1** (N-(2-hydroxyphenyl)-acetamide) (MeOD).

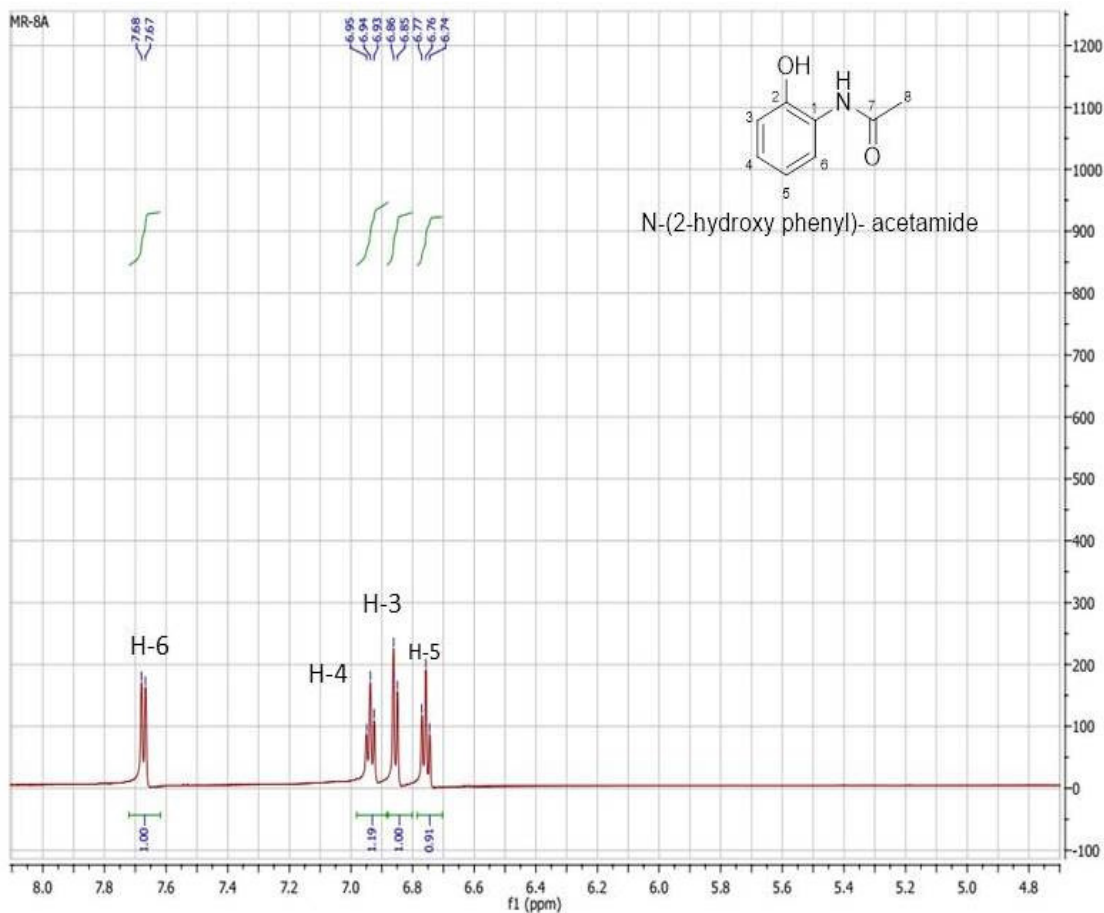

**Figure S21: Expanded  $^1\text{H}$ -NMR Spectrum of compound 11 (N-(2-hydroxyphenyl)-acetamide)(MeOD).**



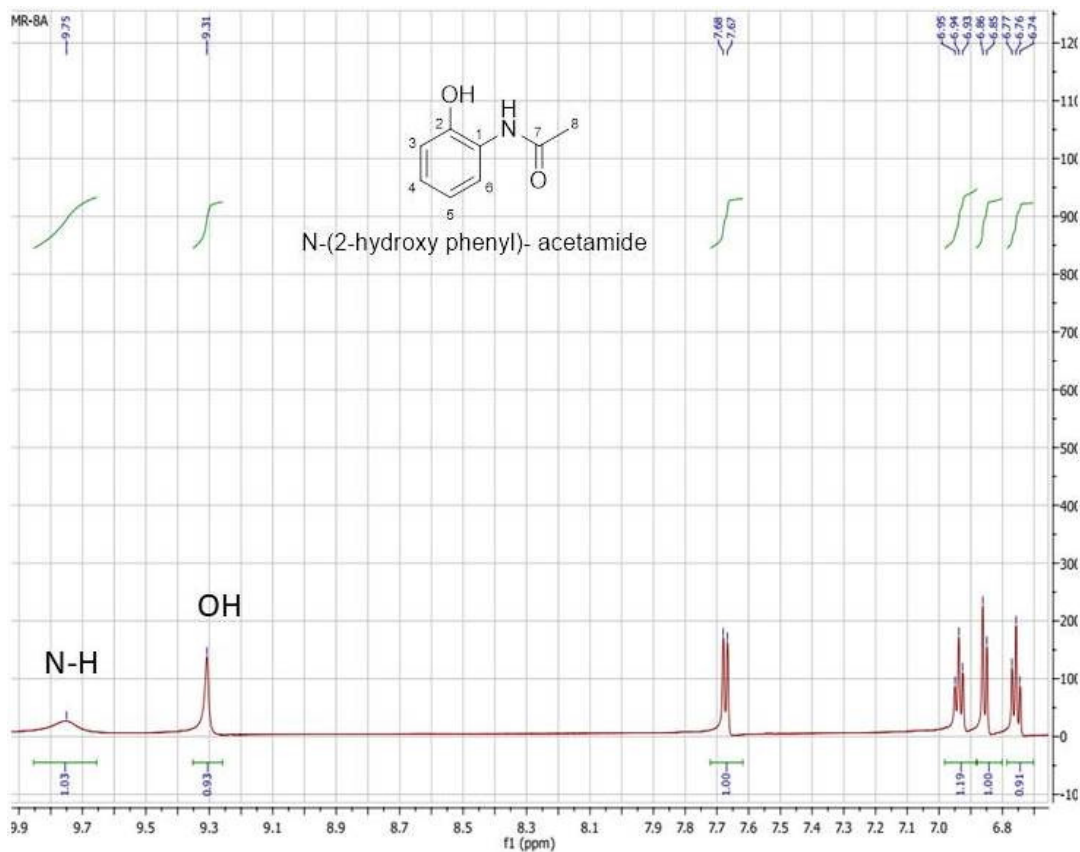

Figure S22: Expanded  $^1\text{H}$ -NMR Spectrum of compound 11 (N-(2-hydroxyphenyl)-acetamide) (MeOD).

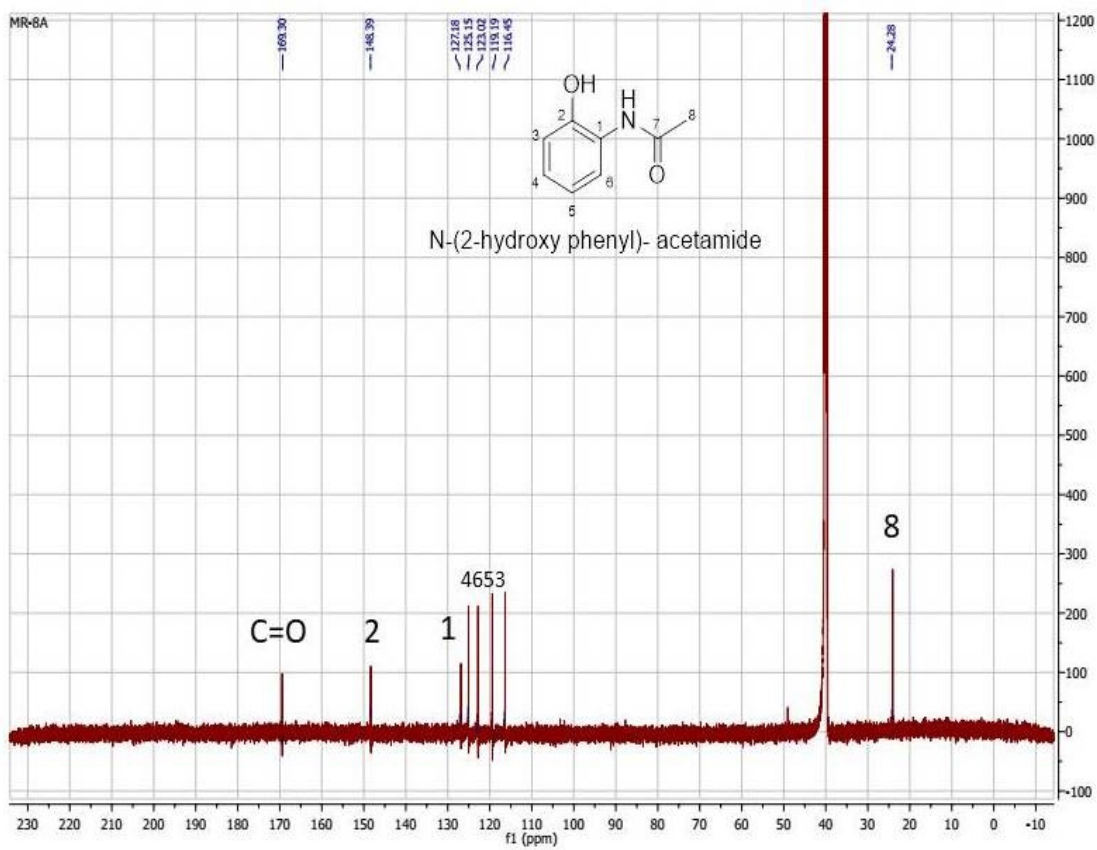

Figure S23:  $^{13}\text{C}$ -NMR spectrum of compound 11 (N-(2-hydroxyphenyl)-acetamide)(MeOD).

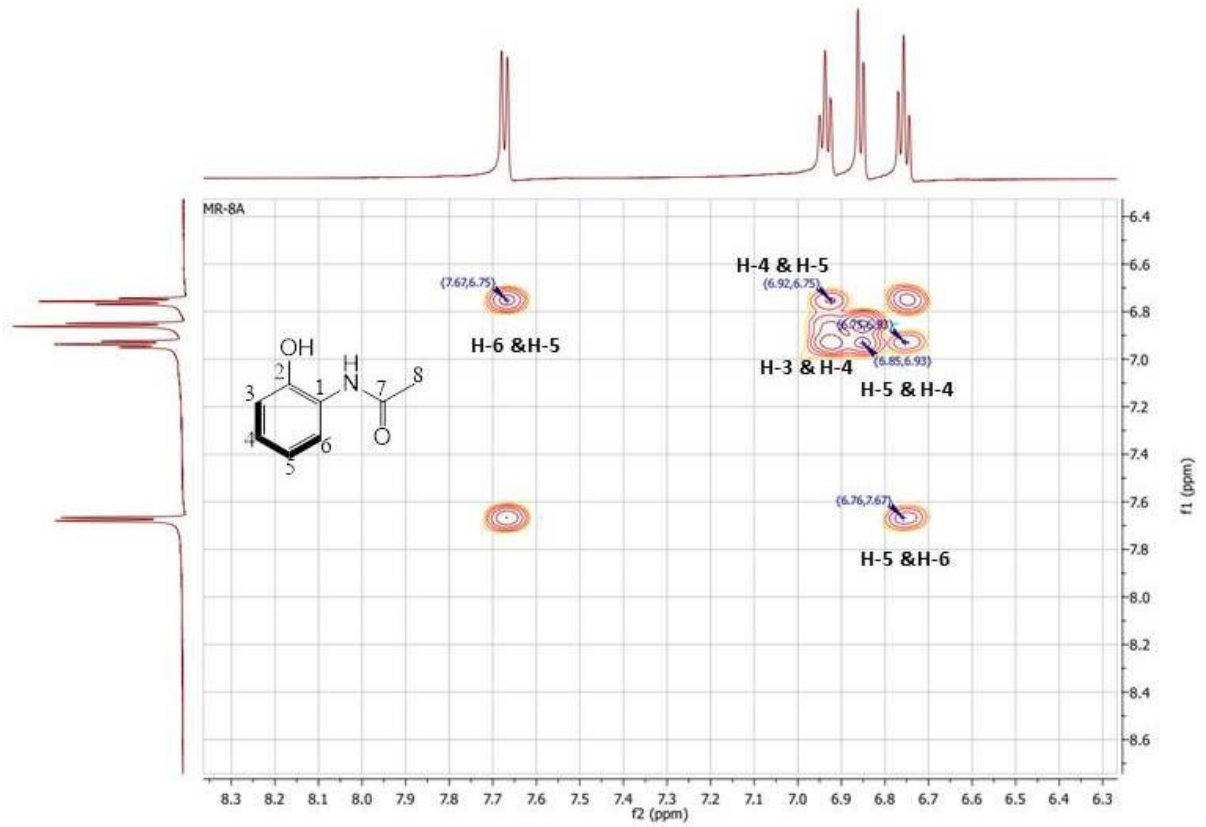

Figure S24:  $^1\text{H}$ - $^1\text{H}$ COSY Spectrum of compound 11 (N-(2-hydroxyphenyl)-acetamide)(MeOD).

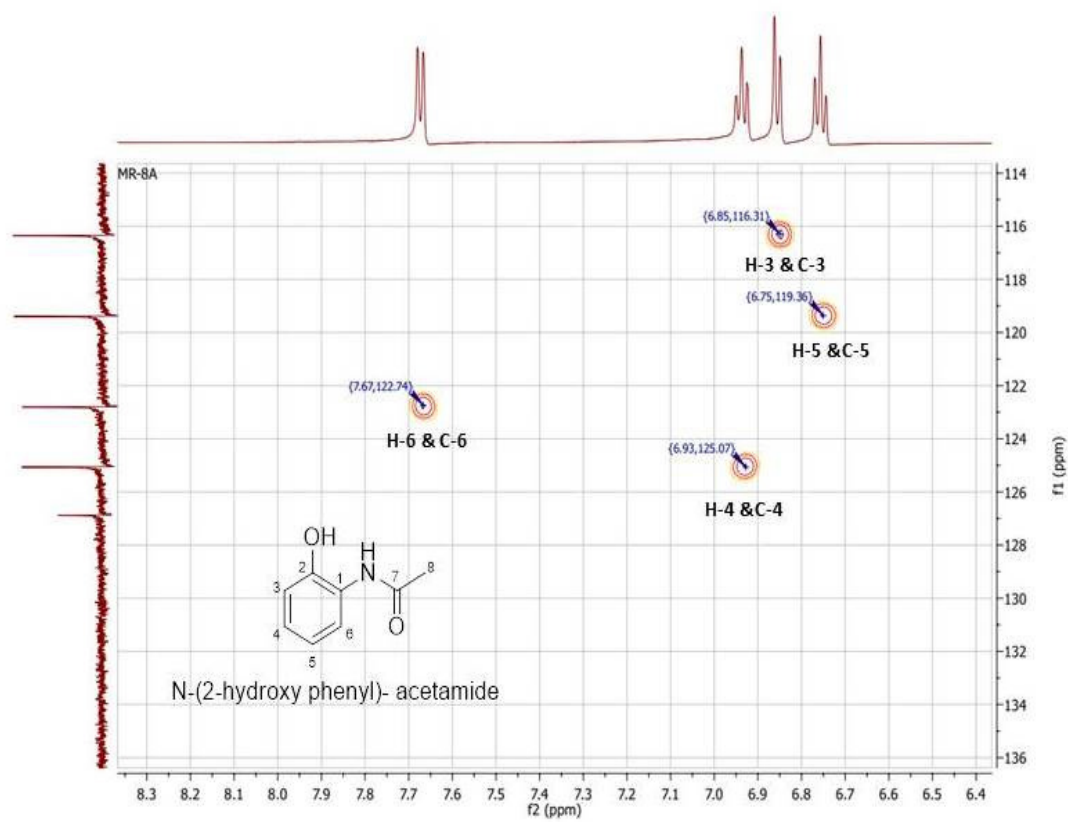

Figure S25: HSQC Spectrum of compound 11(N-(2 hydroxyphenyl)-acetamide)(MeOD).

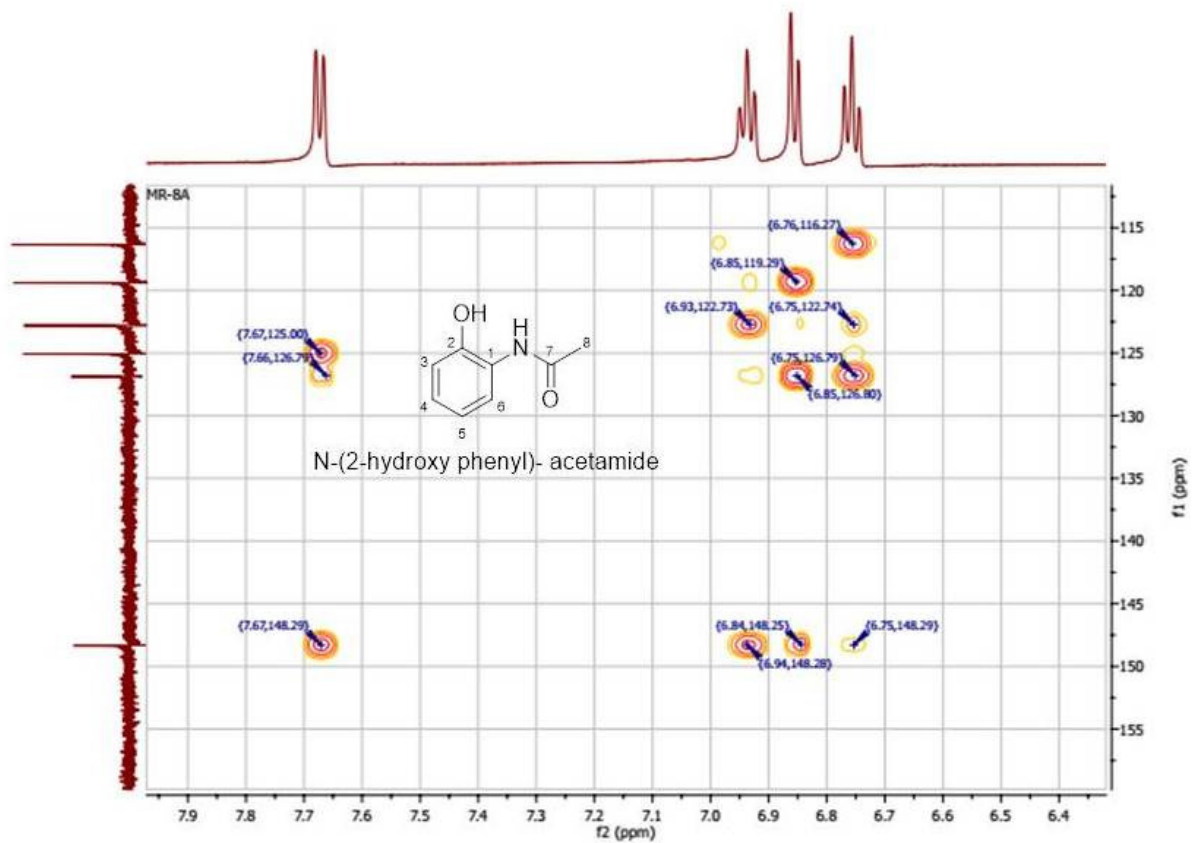

Figure S26: HMBC Spectrum of compound 11(N-(2-hydroxyphenyl)-acetamide)(MeOD).

MR765\_8A #68-133 RT: 3.32-5.43 AV: 33 NL: 1.18E7  
F: FTMS + pESI Full ms (100.00-2000.00)

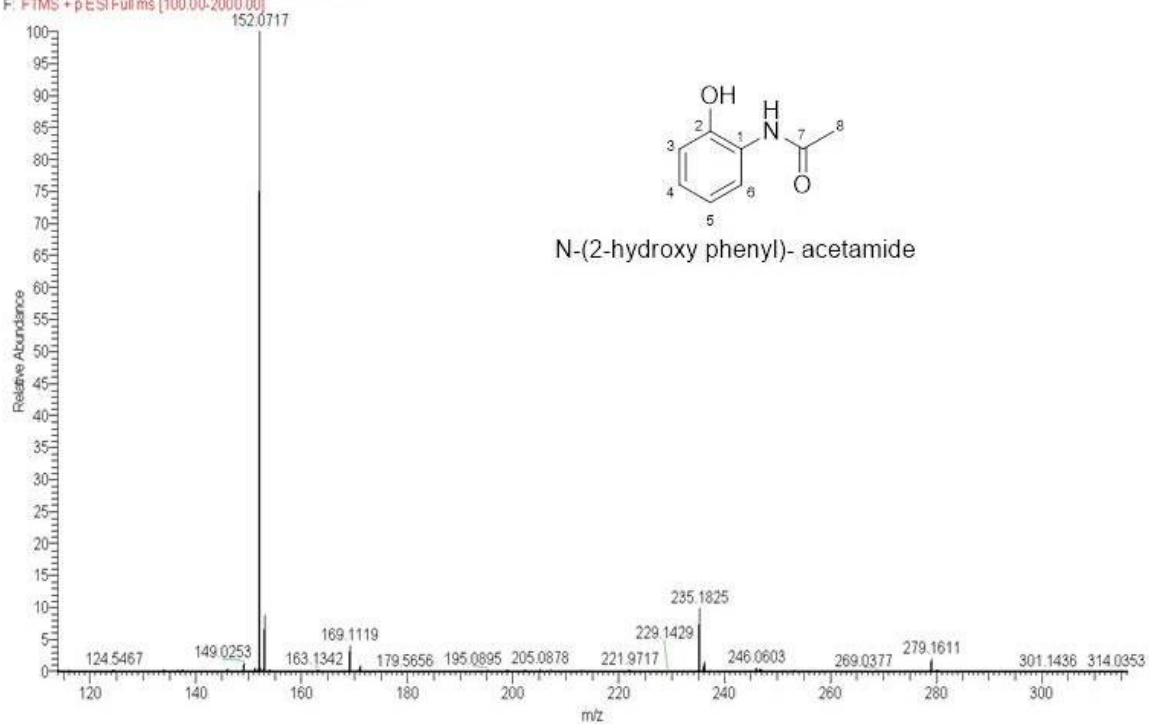

**FigureS27: HRESIMS of compound 11 (N-(2-hydroxyphenyl)-acetamide)(MeOD).  $C_8H_{10}O_2N(M+H)$**

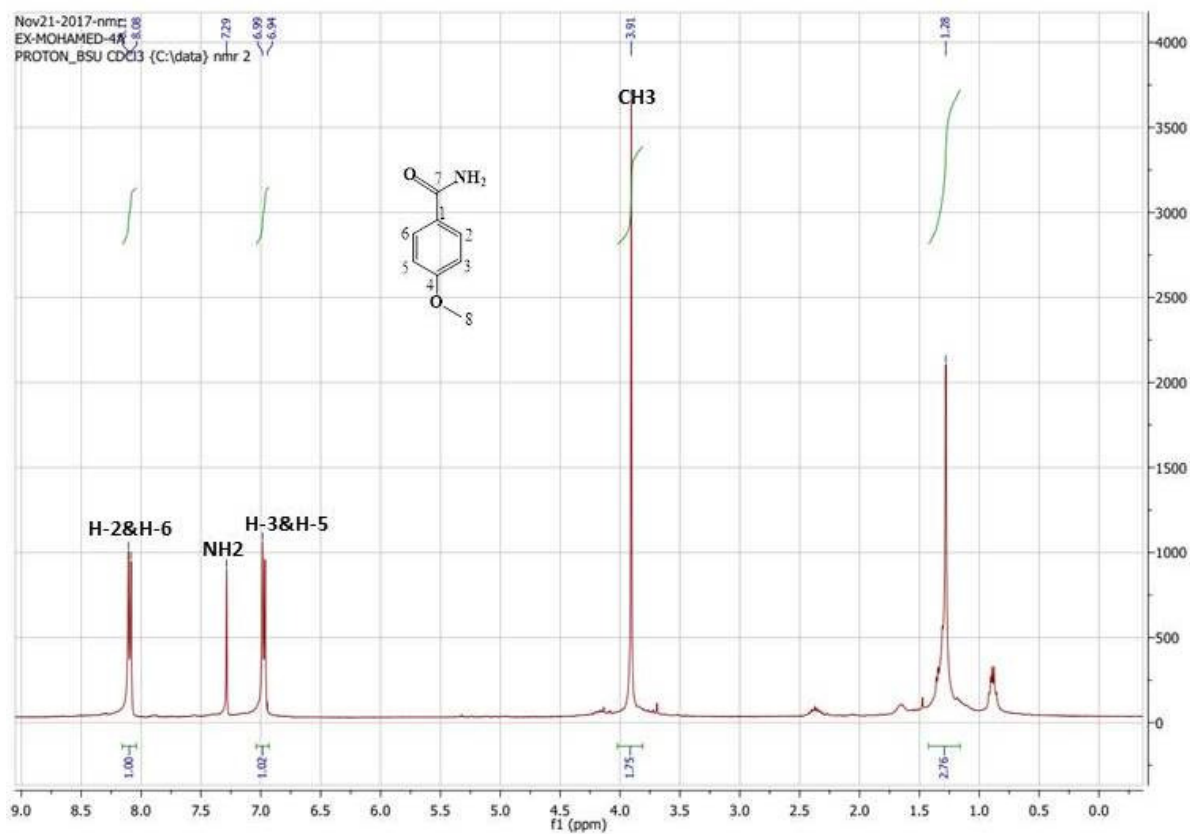

Figure S28: <sup>1</sup>H-NMR Spectrum of compound 12 (P-anisamide)(CDCl<sub>3</sub>).

EX-MOHAMEDFOUDA-4A  
DEPTQ-BSU CDC13 (C:\data) nmr 14

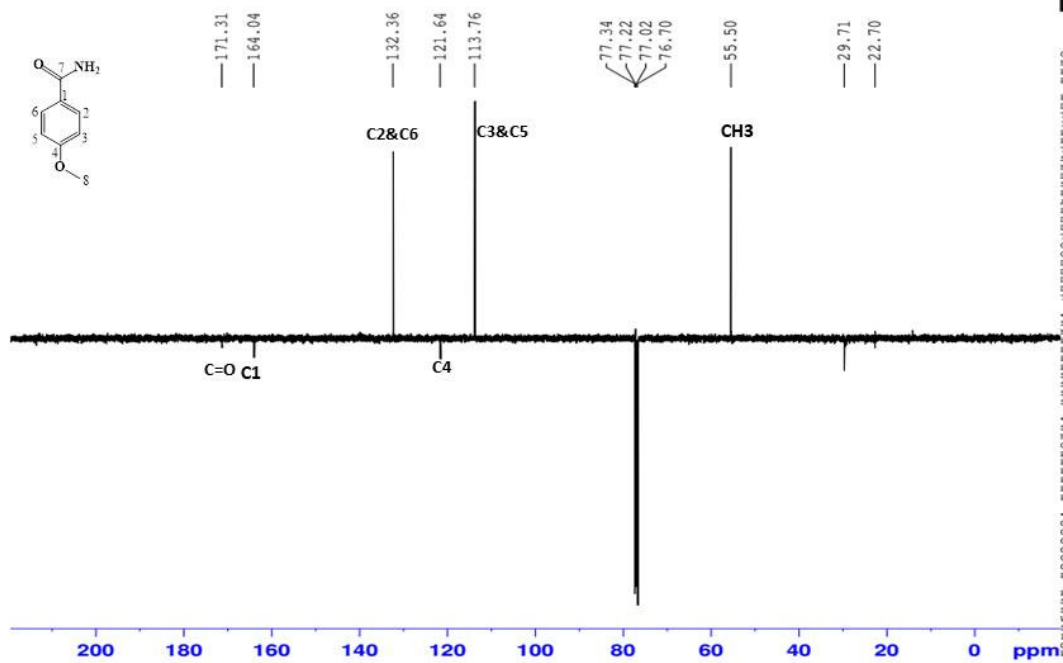

Figure S29: DEPTQ spectrum of compound 12(p-anisamide)(CDCl<sub>3</sub>) .



**Table (S1). The dereplication results of the ethyl acetate fraction of micromonospora UR 56.**

| Polarity            | Rt(min) | m/z      | Formula                                                       | Name                                             | Source                                        | Class            | Activity                                                                | Reference |
|---------------------|---------|----------|---------------------------------------------------------------|--------------------------------------------------|-----------------------------------------------|------------------|-------------------------------------------------------------------------|-----------|
| [ M-H] <sup>-</sup> | 4.48    | 253.0607 | C <sub>14</sub> H <sub>10</sub> N <sub>2</sub> O <sub>3</sub> | 9-Methoxy-1-phenazinecarboxylic acid. (1)        | -----                                         | Phenazine        | -----                                                                   | [1]       |
| [ M-H] <sup>-</sup> | 4.38    | 281.0557 | C <sub>15</sub> H <sub>10</sub> N <sub>2</sub> O <sub>4</sub> | Griseoluteic acid (2)                            | Streptomyces y-9031725                        | Phenazine        | Active against HeLa cells and Ehrlich carcinoma                         | [2]       |
| [ M-H] <sup>-</sup> | 4.44    | 341.0769 | C <sub>17</sub> H <sub>14</sub> N <sub>2</sub> O <sub>6</sub> | Griseolutein A (3)                               | Streptomyces griseoluteus                     | Phenazine        | Antibacterial activity against gram +ve and gram -ve bacteria           | [3]       |
| [ M-H] <sup>-</sup> | 7.44    | 507.2489 | C <sub>29</sub> H <sub>36</sub> N <sub>2</sub> O <sub>6</sub> | Aestivophoenin C (4)                             | Streptomyces purpeofuscus                     | Phenazine        | Neuronal cell protecting agent, antioxidant                             | [4]       |
| [ M+H] <sup>+</sup> | 3.16    | 211.1447 | C <sub>11</sub> H <sub>18</sub> N <sub>2</sub> O <sub>2</sub> | cyclo(D)-Pro-(D)-Leu (5)                         | Actinobacteria                                | diketopiperazine | Antifungal and antitumor                                                | [5]       |
| [ M-H] <sup>-</sup> | 3.53    | 223.0600 | C <sub>11</sub> H <sub>12</sub> O <sub>5</sub>                | Reticulol (6)                                    | Streptomyces mobaraensis                      | benzopyrane      | Inhibitor of cyclic nucleotide phosphodiesterase. Calmodulin antagonist | [6]       |
| [ M-H] <sup>-</sup> | 4.44    | 297.0506 | C <sub>15</sub> H <sub>10</sub> N <sub>2</sub> O <sub>5</sub> | SE-212021 Umycin-A; SM-35 Carboxyexfoliazone (7) | Streptomyces sp.<br>Streptomyces sp. DSM 3813 | phenoxazine      | Anthelmintic                                                            | [7]       |

|                     |       |           |                                                                |                                                |                                                                                     |            |                                                                                                            |      |
|---------------------|-------|-----------|----------------------------------------------------------------|------------------------------------------------|-------------------------------------------------------------------------------------|------------|------------------------------------------------------------------------------------------------------------|------|
| [ M-H] <sup>-</sup> | 7.29  | 511.2799  | C <sub>29</sub> H <sub>40</sub> N <sub>2</sub> O <sub>6</sub>  | Dihydromaltophilin<br>(8)                      | Streptomyces<br>sp                                                                  | Lactam     | antifungal,<br>angiogenesis<br>inhibitor and<br>antiulcer                                                  | [8]  |
| [ M+H] <sup>+</sup> | 11.56 | 629.4235  | C <sub>34</sub> H <sub>60</sub> O <sub>10</sub>                | X-14889-B;<br>Ferensimycin-A;<br>5057-A<br>(9) | Streptomyces<br>sp. x-14889<br>(ATCC31679)                                          | Poly ether | Active against<br>Gram-positive<br>bacteria.<br>Effective in the<br>treatment of<br>coccidiosis of<br>fowl | [9]  |
| [ M-H] <sup>-</sup> | 5.82  | 670.3025  | C <sub>39</sub> H <sub>45</sub> NO <sub>9</sub>                | Naphthomycin C<br>(10)                         | Streptomyces<br>collinus Tue<br>2357                                                | Ansamycin  | Antibacterial<br>and antifungal                                                                            | [10] |
| [ M-H] <sup>-</sup> | 12.91 | 1042.6429 | C <sub>53</sub> H <sub>93</sub> N <sub>3</sub> O <sub>17</sub> | Neocopiamycin A<br>(12)                        | Streptomyces<br>hygroscopicus<br>var.<br>crystallogenes<br>ifm 1136 (ATCC<br>19040) | Lactone    | Antifungal                                                                                                 | [11] |
| [M+H] <sup>+</sup>  | 11.62 | 598.1100  | C <sub>32</sub> H <sub>22</sub> O <sub>12</sub>                | Crisamicin A<br>(13)                           | Micromonospo<br>ra m.<br>purpureochro<br>mogenes<br>celinoensis                     | Quinone    | Active against<br>Gram-positive<br>bacteria.<br>Immunomodula<br>tor                                        | [12] |

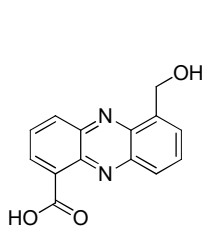

$C_{14}H_{10}N_2O_3$   
Exact mass:254.0691  
1-hydroxymethyl-6-carboxy phenazine  
(1)

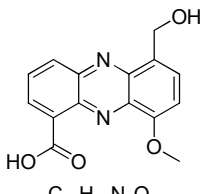

$C_{15}H_{12}N_2O_4$   
Exact mass:284.0797  
Griseoluteic acid  
(2)

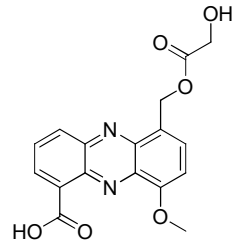

$C_{17}H_{14}N_2O_6$   
Exact mass:342.0852  
Griseolutein A  
(3)

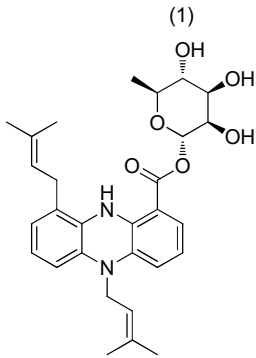

$C_{29}H_{36}N_2O_6$   
Exact mass:508.2573  
Aestivophoenin C  
(4)

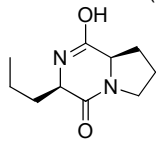

$C_{11}H_{18}N_2O_2$   
Exact mass:210.1368  
cyclo(D)-Pro-(D)-Leu  
(5)

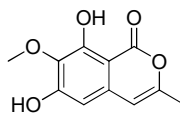

$C_{11}H_{10}O_5$   
Exact mass:222.0528  
Reticulol  
(6)

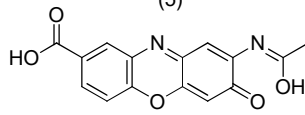

$C_{15}H_{10}N_2O_5$   
Exact mass:298.0590  
Umycin-A  
(7)

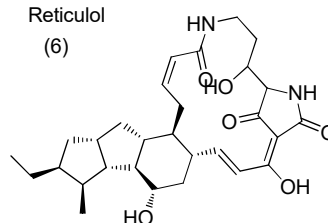

$C_{29}H_{40}N_2O_6$   
Exact mass:512.2886  
Dihydromaltophilin  
(8)

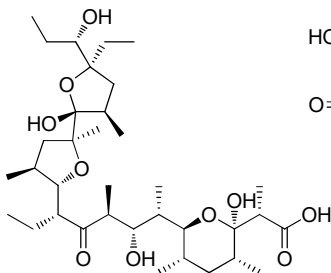

$C_{34}H_{60}O_{10}$   
Exact mass:628.4186  
Ferensimycin-A  
(9)

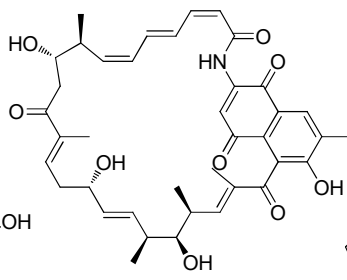

$C_{39}H_{45}NO_9$   
Exact mass:671.3094  
Naphthomycin C  
(10)

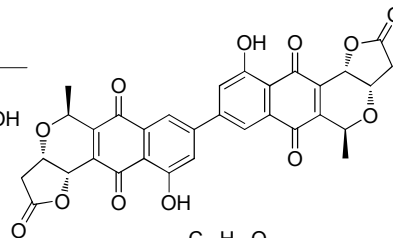

$C_{32}H_{22}O_{12}$   
Exact mass:598.1111  
Crisamicin A  
(11)

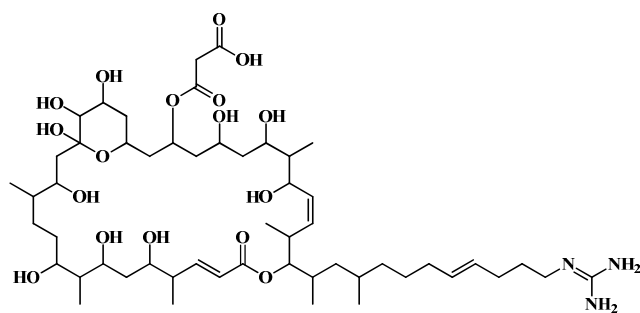

$C_{53}H_{93}N_3O_{17}$

Exact mass:1043.6505

Neocopiamycin A

12

Fig S30. Dereplicated metabolites from metabolomic analysis of *Micromonospora* sp UR 56

**Table (S2). The dereplication results of the ethyl acetate fraction of *Actinokinospora* EG49.**

| Polarity           | Rt(min) | m/z      | Formula                                                          | Name                    | Source                            | Activity                       | Class            | Reference |
|--------------------|---------|----------|------------------------------------------------------------------|-------------------------|-----------------------------------|--------------------------------|------------------|-----------|
| [M+H] <sup>+</sup> | 11.98   | 611.2127 | C <sub>32</sub> H <sub>34</sub> O <sub>12</sub>                  | Actinosporin A<br>(13)  | Actinokinospora EG<br>49          | Anti-trypanosomal              | Anthraquinone    | [13]      |
| [M+H] <sup>+</sup> | 10.60   | 519.1444 | C <sub>25</sub> H <sub>26</sub> O <sub>12</sub>                  | Actinosporin B<br>(14)  | Actinokinospora EG<br>49          | -----                          | Anthraquinone    | [13]      |
| [M-H] <sup>-</sup> | 4.80    | 467.1350 | C <sub>25</sub> H <sub>24</sub> O <sub>9</sub>                   | Atramycin A<br>(15)     | Streptomyces atratus              | Antitumor                      | Anthraquinone    | [14]      |
| [M-H] <sup>-</sup> | 4.35    | 451.1386 | C <sub>25</sub> H <sub>24</sub> O <sub>8</sub>                   | Atramycin B<br>(16)     | Streptomyces atratus              | Antitumor                      | Anthraquinone    | [14]      |
| [M+H] <sup>+</sup> | 3.14    | 152.0709 | C <sub>8</sub> H <sub>9</sub> NO <sub>2</sub>                    | Streptokordin<br>(17)   | Actinobacteria<br>Streptomyces sp | Cytotoxic                      | Methyl pyridine  | [15]      |
| [M+H] <sup>+</sup> | 2.43    | 197.1289 | C <sub>10</sub> H <sub>16</sub> N <sub>2</sub><br>O <sub>2</sub> | Cyclo-(proly-valyl)(18) | Actinobacteria                    | -----                          | diketopiperazine |           |
| [M-H] <sup>-</sup> | 2.31    | 463.1708 | C <sub>22</sub> H <sub>28</sub> N <sub>2</sub><br>O <sub>9</sub> | Antibiotic 19A(19)      | USF Streptomyces sp.<br>USF19     | Lipoxygenase inhibitor         | Quinone          | [16]      |
| [M+H] <sup>+</sup> | 12.65   | 701.481  | C <sub>38</sub> H <sub>68</sub> O <sub>11</sub>                  | Inostamycin<br>(20)     | Streptomyces sp.                  | Antibacterial and antimetastic | polyether        | [17]      |

|                     |       |          |                                                                  |                         |                                                          |                                                       |             |      |
|---------------------|-------|----------|------------------------------------------------------------------|-------------------------|----------------------------------------------------------|-------------------------------------------------------|-------------|------|
| [ M-H] <sup>-</sup> | 6.87  | 253.049  | C <sub>15</sub> H <sub>10</sub> O <sub>4</sub>                   | Daidzein(21)            | Micromonospora<br>halophytica                            | Antioxidant with<br>anticancer and<br>bone-protectant | isoflavones | [18] |
| [ M-H] <sup>-</sup> | 4.90  | 341.0657 | C <sub>18</sub> H <sub>14</sub> O <sub>7</sub>                   | Momofulvenone-<br>A(22) | Streptomyces<br>diastatochromogenes<br>(strain Tue 2895) | -----                                                 | Quinone     | [19] |
| [ M+H] <sup>+</sup> | 12.03 | 523.3602 | C <sub>26</sub> H <sub>46</sub> N <sub>6</sub><br>O <sub>5</sub> | Lucentamycin C<br>(23)  | Actinobacteria<br>Nocardiopsis<br>lucentensis            | cytotoxic                                             | Peptide     | [20] |



**Table (S3).The dereplication results of the ethyl acetate fraction of co-culture.**

| Name                                                                      | Formula                                                          | m/z       | Source                                    | Class       | Activity                                              | Reference |
|---------------------------------------------------------------------------|------------------------------------------------------------------|-----------|-------------------------------------------|-------------|-------------------------------------------------------|-----------|
| <b>Phenazine-1-carboxylic acid (24)</b><br><b>Tubermycin B</b>            | C <sub>13</sub> H <sub>8</sub> N <sub>2</sub> O <sub>2</sub>     | 224.0580  | Streptomyces antibioticus strain Tue 2706 | Phenazine   | Antibacterial                                         | [21]      |
| <b>Saphenic acid methyl ether (methyl saphenate)(25)</b>                  | C <sub>16</sub> H <sub>14</sub> N <sub>2</sub> O <sub>3</sub>    | 282.0999  | Streptomyces antibioticus strain Tue 2706 | Phenazine   | -----<br>-                                            | [22]      |
| <b>dimethyl Phenazine 1,6-dicarboxylate (26)</b>                          | C <sub>16</sub> H <sub>12</sub> N <sub>2</sub> O <sub>4</sub>    | 296.0781  | Prod. by a Streptomyces sp                | phenazine   | -----<br>-                                            | [23]      |
| <b>Phenazine -1,6-carboxylic acid mono methyl ester (phencomycin)(27)</b> | C <sub>15</sub> H <sub>10</sub> N <sub>2</sub> O <sub>4</sub>    | 282.0648  | Prod. by a Streptomyces sp                | Phenazine   | Antibacterial and antitumor                           | [23]      |
| <b>Citreamicin ε (28)</b>                                                 | C <sub>30</sub> H <sub>25</sub> NO <sub>11</sub>                 | 575.14275 | Actinobacteria Streptomyces caelestis     | Quinone     | Antibacterial including MRSA                          | [24]      |
| <b>Antibiotic SF 2446A2(29)</b>                                           | C <sub>34</sub> H <sub>35</sub> NO <sub>15</sub>                 | 697.2001  | Streptomyces sp. sf2446                   | Quinone     | Active against Gram-positive bacteria and mycoplasmas | [25]      |
| <b>7 - Hydroxybenanomicin-A (30)</b>                                      | C <sub>39</sub> H <sub>41</sub> NO <sub>20</sub>                 | 843.2216  | Actinomadura sp. mh193-16f4               | Quinone     | -----                                                 | [26]      |
| <b>11-Hydroxycinerubin A (31)</b>                                         | C <sub>42</sub> H <sub>53</sub> NO <sub>17</sub>                 | 843.3308  | Streptomyces galilaeus                    | Quinone     | -----<br>-                                            | [27]      |
| <b>Tetrin B (32)</b>                                                      | C <sub>34</sub> H <sub>51</sub> NO <sub>14</sub>                 | 697.3304  | Streptomyces sp.                          | Macrolide   | Antifungal                                            | [28]      |
| <b>Maridomycin-II (33)</b>                                                | C <sub>42</sub> H <sub>69</sub> NO <sub>16</sub>                 | 843.4610  | Streptomyces platensis-malvinus           | Macrolide   | Antibacterial                                         | [29]      |
| <b>Dactylocycline-A(34)</b>                                               | C <sub>31</sub> H <sub>40</sub> ClN <sub>3</sub> O <sub>13</sub> | 697.2244  | Dactylosporangium sp.                     | Tetracyclin | Antibacterial                                         | [30]      |



|                                                         |                                                               |          |                                                          |                  |                             |      |
|---------------------------------------------------------|---------------------------------------------------------------|----------|----------------------------------------------------------|------------------|-----------------------------|------|
|                                                         |                                                               |          | (ATCC 53693)                                             |                  |                             |      |
| <b>pulicatin A (35)</b>                                 | C <sub>11</sub> H <sub>13</sub> NO <sub>2</sub> S             | 223.0667 | Actinobacteria<br>Streptomyces sp                        | Thiazole         | -----                       | [31] |
| <b>Antibiotic MSD 92 (36)</b>                           | C <sub>8</sub> H <sub>9</sub> N <sub>5</sub> O <sub>3</sub>   | 223.0699 | Streptomyces sp. IM2096<br><br>Streptomyces sp. GW7/2495 | pyrimidotriazine | Antibacterial               | [32] |
| <b>MKN-003A (37)</b>                                    | C <sub>13</sub> H <sub>20</sub> O <sub>3</sub>                | 224.1412 | Actinobacteria<br>Streptomyces sp                        | butenolide       | Antifouling                 | [33] |
| <b>Cairomycin B (38)</b>                                | C <sub>10</sub> H <sub>15</sub> N <sub>3</sub> O <sub>3</sub> | 225.1108 | Streptomyces AS-C-19                                     | Cyclic peptide   | Antibacterial               | [34] |
| <b>(E)-4-Phenyl-3-(pyridine-2-yl)but-2-en-1-ol (39)</b> | C <sub>15</sub> H <sub>15</sub> NO                            | 225.1148 | Streptomyces sp.                                         | Pyridine         | Antiproliferative agent     | [35] |
| <b>Lemonomycin (40)</b>                                 | C <sub>27</sub> H <sub>41</sub> N <sub>3</sub> O <sub>9</sub> | 551.2837 | Streptomyces candidus                                    | isoquinoline     | Antibacterial and antitumor | [36] |
| <b>Sinefungin VA (41)</b>                               | C <sub>23</sub> H <sub>37</sub> N <sub>9</sub> O <sub>7</sub> | 551.2810 | Streptomyces sp. K05-0178                                | nucleoside       | antitrypanosomal            | [37] |
| <b>Deacetylanisomycin (42)</b>                          | C <sub>12</sub> H <sub>17</sub> NO <sub>3</sub>               | 223.1203 | marine Streptomyces sp. SA3097                           | Pyrrolidine      | -----<br>---                | [38] |
| <b>1-Hydroxyanthraquinone (43)</b>                      | C <sub>14</sub> H <sub>8</sub> O <sub>3</sub>                 | 224.0468 | Synthetic                                                | Quinone          | -----<br>---                | [39] |
| <b>Pyramidamycin D (44)</b>                             | C <sub>10</sub> H <sub>12</sub> N <sub>2</sub> O <sub>4</sub> | 224.0791 | Streptoverticillium morookaense                          | Amide            | -----<br>----               | [40] |
| <b>5-Chloro-6-methoxy-1-methylisatin (45)</b>           | C <sub>10</sub> H <sub>8</sub> ClNO <sub>3</sub>              | 225.0187 | Micromonospora carbonacea                                | Indole           | -----<br>----               | [41] |

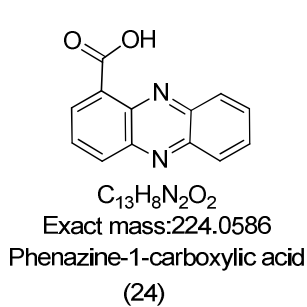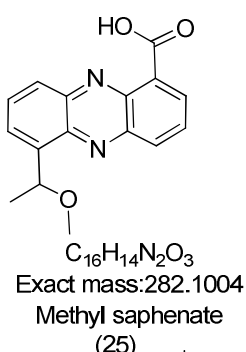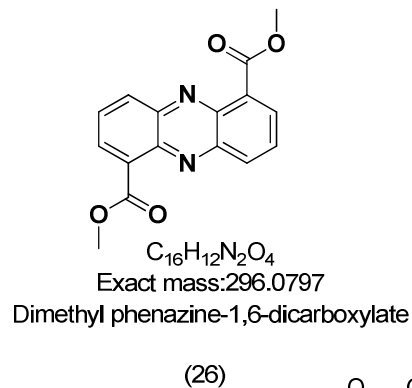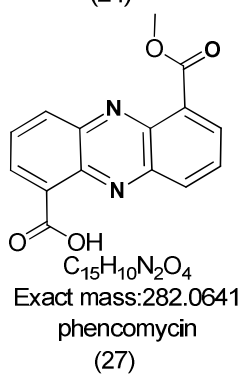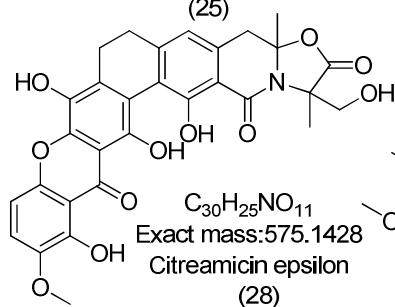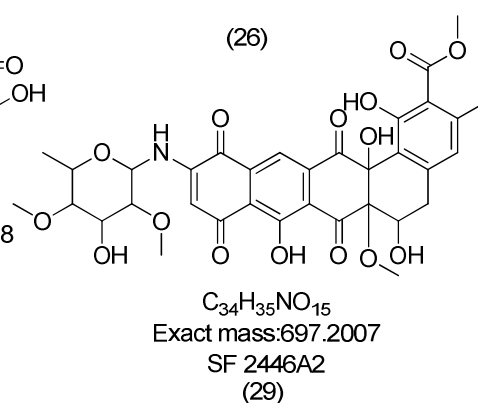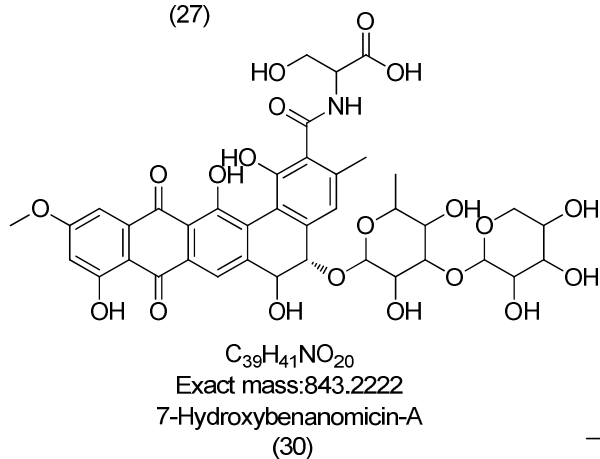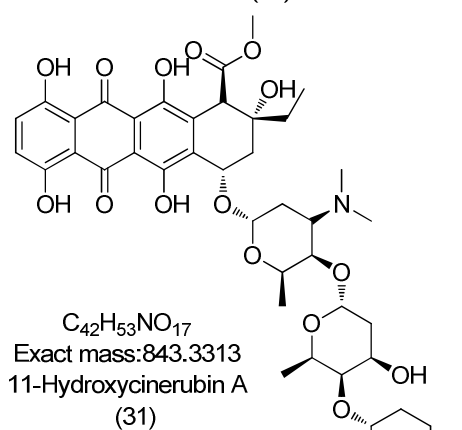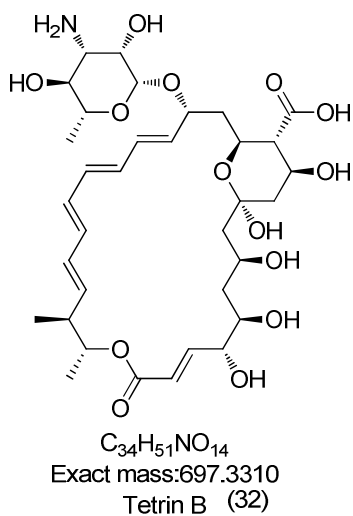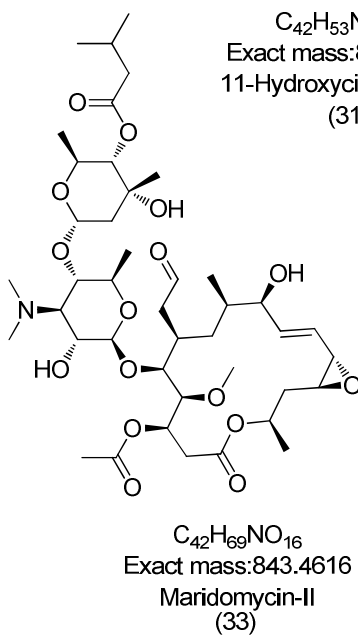

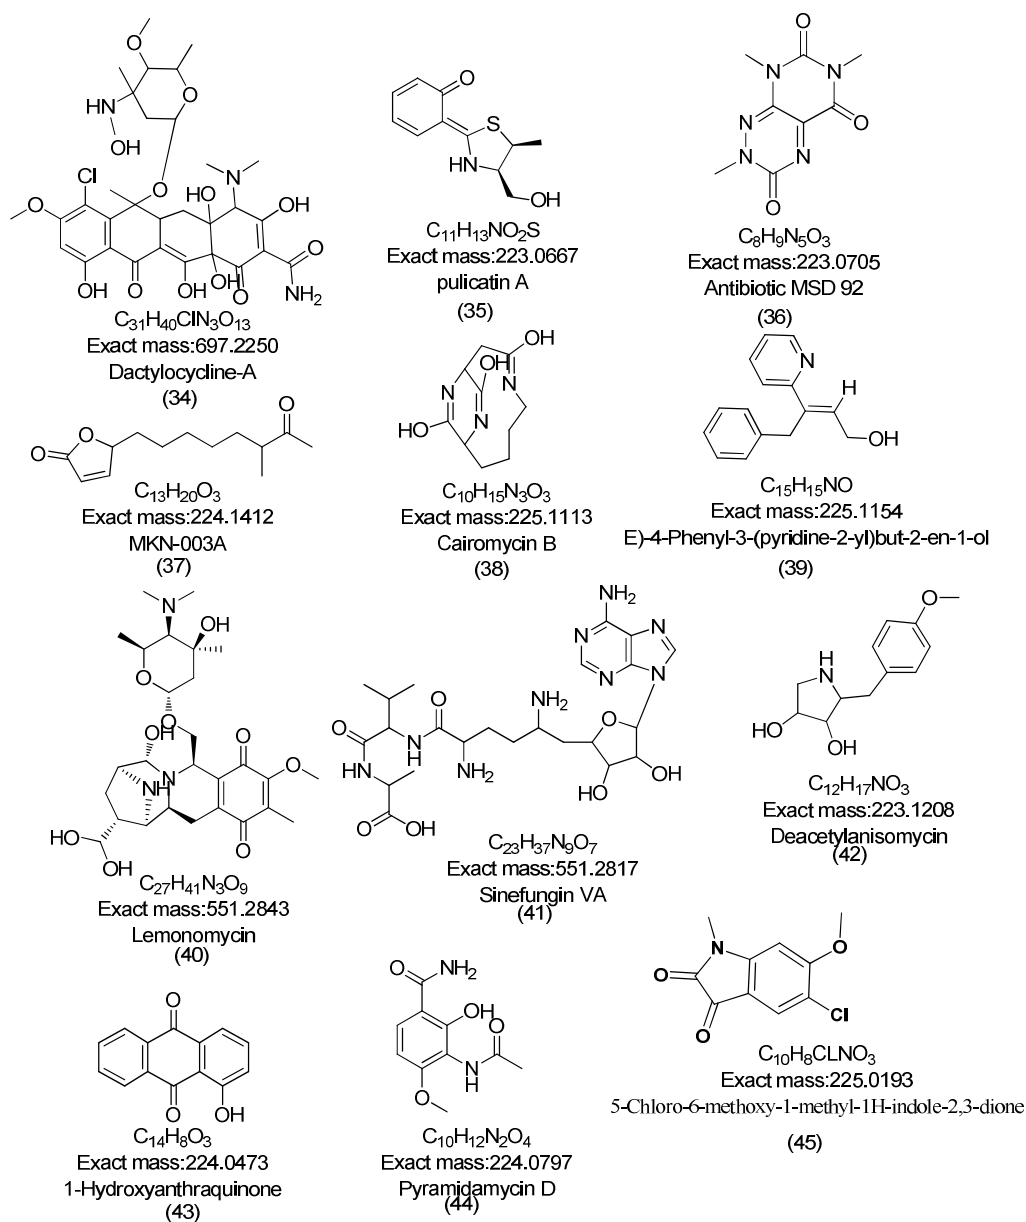

**Fig S32. Dereplicated metabolites from metabolomic analysis of *co-culture Micromonospora sp. UR 56* and *Actinokineospora sp. EG49*.**

1. Byng, G.S.; Turner, J.M. Phenazine biosynthesis by a pseudomonad 1975.
2. Wang, Y.; Luo, Q.; Zhang, X.; Wang, W. Isolation and purification of a modified phenazine, griseoluteic acid, produced by *Streptomyces griseoluteus* P510. *Res. Microbiol.* **2011**, *162*, 311–319.
3. Challand, S.R.; Herbert, R.B.; Holliman, F.G. A new phenazine synthesis. The synthesis of griseoluteic acid, griseolutein A, and methyl diacetylgriseolutein B. *J. Chem. Soc. D Chem. Commun.* **1970**, 1423–1425.
4. Kunigami, T.; Shin-Ya, K.; Furihata, K.; Furihata, K.; Hayakawa, Y.; Seto, H. A novel neuronal cell protecting substance, aestivophoenin C, produced by *Streptomyces purpeofuscus*. *J. Antibiot. (Tokyo)*. **1998**, *51*, 880–882.
5. Fdhila, F.; Vázquez, V.; Sánchez, J.L.; Riguera, R. dd-Diketopiperazines: Antibiotics Active against *Vibrio anguillarum* Isolated from Marine Bacteria Associated with Cultures of *Pecten maximus*. *J. Nat. Prod.* **2003**, *66*, 1299–1301.
6. Mitscher, L.A.; Andres, W.W.; McCrae, W. Reticulol, a new metabolic isocoumarin. *Experientia* **1964**, *20*, 258–259.
7. Abdelfattah, M.S. A new bioactive aminophenoxazinone alkaloid from a marine-derived actinomycete. *Nat. Prod. Res.* **2013**, *27*, 2126–2131.
8. Graupner, P.R.; Thornburgh, S.; Mathieson, J.T.; Chapin, E.L.; Kemmitt, G.M.; Brown, J.M.; Snipes, C.E. Dihydromaltophilin; a novel fungicidal tetramic acid containing metabolite from *Streptomyces* sp. *J. Antibiot. (Tokyo)*. **1997**, *50*, 1014–1019.
9. Kusakabe, Y.; Mizuno, T.; Kawabata, S.; Tanji, S.; Seino, A.; Seto, H.; Take, N. Ferensimycins A and B, two polyether antibiotics. *J. Antibiot. (Tokyo)*. **1982**, *35*, 1119–1129.
10. Mochizuki, J.; Kobayashi, E.; Furihata, K.; Kawaguchi, A.; Seto, H.; Take, N. New ansamycin antibiotics, naphthoquinomycins A and B, inhibitors of fatty acid synthesis in *Escherichia coli*. *J. Antibiot. (Tokyo)*. **1986**, *39*, 157–161.
11. Arai, T.; Uno, J.U.N.; Horimi, I.; Fukushima, K. Isolation of neocopiamycin A from *Streptomyces hygrosopicus* var. *crystallogenes*, the copiamycin source. *J. Antibiot. (Tokyo)*. **1984**, *37*, 103–109.
12. Nelson, R.A.; Pope Jr, J.A.; Luedemann, G.M.; Mcdaniel, L.E.; Schaffner, C.P. Crisamicin A, A new antibiotic from micromonospora. *J. Antibiot. (Tokyo)*. **1986**, *39*, 335–344.
13. Abdelmohsen, U.; Cheng, C.; Viegelmann, C.; Zhang, T.; Grkovic, T.; Ahmed, S.; Quinn, R.; Hentschel, U.; Edrada-Ebel, R. Dereplication strategies for targeted isolation of new antitrypanosomal actinosporins A and B from a marine sponge associated-*Actinokineospora* sp. EG49. *Mar. Drugs* **2014**, *12*, 1220–1244.
14. Fujioka, K.; Furihata, K.; Shimazu, A.; Hayakawa, Y.; Seto, H. Isolation and characterization of atramycin A and atramycin B, new isotetracenone type antitumor antibiotics. *J. Antibiot. (Tokyo)*. **1991**, *44*, 1025–1028.

15. Jeong, S.-Y.; Shin, H.J.; Kim, T.S.; Lee, H.-S.; Park, S.; Kim, H.M. Streptokordin, a new cytotoxic compound of the methylpyridine class from a marine-derived *Streptomyces* sp. KORDI-3238. *J. Antibiot. (Tokyo)*. **2006**, *59*, 234–240.
16. Komoda, T.; Morimitsu, Y.; Hirota, H.; Hirota, A. USF-19A, a new lipoxygenase inhibitor from *Streptomyces* sp. *Biosci. Biotechnol. Biochem.* **1995**, *59*, 924–926.
17. Imoto, M.; Umezawa, K.; Takahashi, Y.; Naganawa, H.; Iitaka, Y.; Nakamura, H.; Koizumi, Y.; Sasaki, Y.; Hamada, M.; Sawa, T. Isolation and structure determination of inostamycin, a novel inhibitor of phosphatidylinositol turnover. *J. Nat. Prod.* **1990**, *53*, 825–829.
18. Hirakura, K.; Morita, M.; Nakajima, K.; Sugama, K.; Takagi, K.; Niitsu, K.; Ikeya, Y.; Maruno, M.; Okada, M. Phenolic glucosides from the root of *Pueraria lobata*. *Phytochemistry* **1997**, *46*, 921–928.
19. Volkmann, C.; Rössner, E.; Metzler, M.; Zähler, H.; Zeeck, A. Metabolic products of microorganisms, 271. Momofulvenone A and B, new benzo [b] fluorene quinones from *Streptomyces*. *Liebigs Ann.* **1995**, *1995*, 1169–1172.
20. Cho, J.Y.; Williams, P.G.; Kwon, H.C.; Jensen, P.R.; Fenical, W. Lucentamycins A– D, cytotoxic peptides from the marine-derived actinomycete *Nocardopsis lucentensis*. *J. Nat. Prod.* **2007**, *70*, 1321–1328.
21. Jayatilake, G.S.; Thornton, M.P.; Leonard, A.C.; Grimwade, J.E.; Baker, B.J. Metabolites from an Antarctic sponge-associated bacterium, *Pseudomonas aeruginosa*. *J. Nat. Prod.* **1996**, *59*, 293–296.
22. Geiger, A.; Keller-Schierlein, W.; Brandl, M.; ZÄHNER, H. Metabolites of microorganisms. 247 phenazines from *Streptomyces antibioticus*, strain Tü 2706. *J. Antibiot. (Tokyo)*. **1988**, *41*, 1542–1551.
23. Chatterjee, S.; Vijayakumar, E.K.S.; Franco, C.M.M.; Maurya, R.; Blumbach, J.; Ganguli, B.N. Phencomycin, a new antibiotic from a *Streptomyces* species HIL Y-9031725. *J. Antibiot. (Tokyo)*. **1995**, *48*, 1353–1354.
24. Hopp, D.C.; Milanowski, D.J.; Rhea, J.; Jacobsen, D.; Rabenstein, J.; Smith, C.; Romari, K.; Clarke, M.; Francis, L.; Irigoyen, M. Citreamicins with potent gram-positive activity. *J. Nat. Prod.* **2008**, *71*, 2032–2035.
25. Takeda, U.; Okada, T.; Takagi, M.; Gomi, S.; Itoh, J.; Sezaki, M.; Ito, M.; MIYADOH, S.; SHOMURA, T. SF2446, NEW BENZO [α] NAPHTHACENE QUINONE ANTIBIOTICS. *J. Antibiot. (Tokyo)*. **1988**, *41*, 417–424.
26. Kondo, S.; Gomi, S.; Uotani, K.; Miyakawa, S.; Inouye, S.; Ikeda, D.; Takeuchi, T. New hydroxybenanomycins produced by *Actinomadura*. *Drugs Exp. Clin. Res.* **1992**, *18*, 217–224.
27. Oki, T.; Yoshimoto, A.; Matsuzawa, Y.; Takeuchi, T.; Umezawa, H. Biosynthesis of anthracycline antibiotics by *Streptomyces galilaeus*. *J. Antibiot. (Tokyo)*. **1980**, *33*, 1331–1340.
28. Rinehart Jr, K.L.; Tucker, W.P.; Pandey, R.C. 1 Polyene antibiotics. III. Structure of tetrin B. *J. Am. Chem. Soc.* **1971**, *93*, 3747–3751.

29. Muroi, M.; IZAWA, M.; ASAI, M.; KISHI, T.; MIZUNO, K. MARIDOMYCIN, A NEW MACROLIDE ANTIBIOTIC. II. *J. Antibiot. (Tokyo)*. **1973**, *26*, 199–205.
30. Tymiak, A.A.; Aklonis, C.; Bolgar, M.S.; Kahle, A.D.; Kirsch, D.R.; O'Sullivan, J.; Porubcan, M.A.; Principe, P.; Trejo, W.H. Dactylocyclines: novel tetracycline glycosides active against tetracycline-resistant bacteria. *J. Org. Chem.* **1993**, *58*, 535–537.
31. Lin, Z.; Antemano, R.R.; Hughen, R.W.; Tianero, M.D.B.; Peraud, O.; Haygood, M.G.; Concepcion, G.P.; Olivera, B.M.; Light, A.; Schmidt, E.W. Pulicatins A– E, neuroactive thiazoline metabolites from cone snail-associated bacteria. *J. Nat. Prod.* **2010**, *73*, 1922–1926.
32. Wang, H.; Lim, K.L.; Yeo, S.L.; Xu, X.; Sim, M.M.; Ting, A.E.; Wang, Y.; Yee, S.; Tan, Y.H.; Pallen, C.J. Isolation of a novel protein tyrosine phosphatase inhibitor, 2-methyl-fervenulone, and its precursors from *Streptomyces*. *J. Nat. Prod.* **2000**, *63*, 1641–1646.
33. Strand, M.; Carlsson, M.; Uvell, H.; Islam, K.; Edlund, K.; Cullman, I.; Altermark, B.; Mei, Y.-F.; Elofsson, M.; Willassen, N.-P. Isolation and characterization of anti-adenoviral secondary metabolites from marine actinobacteria. *Mar. Drugs* **2014**, *12*, 799–821.
34. Shimi, I.R.; Abedallah, N.; Fathy, S. Cairomycin B, a new antibiotic. *Antimicrob. Agents Chemother.* **1977**, *11*, 373–375.
35. Shin, C.; Lim, H.; Moon, S.; Kim, S.; Yong, Y.; Kim, B.-J.; Lee, C.-H.; Lim, Y. A novel antiproliferative agent, phenylpyridineylbutenol, isolated from *Streptomyces* sp. *Bioorg. Med. Chem. Lett.* **2006**, *16*, 5643–5645.
36. He, H.; Shen, B.; Carter, G.T. Structural elucidation of lemomycin, a potent antibiotic from *Streptomyces candidus*. *Tetrahedron Lett.* **2000**, *41*, 2067–2071.
37. Niitsuma, M.; Hashida, J.; Iwatsuki, M.; Mori, M.; Ishiyama, A.; Namatame, M.; Nishihara-Tsukashima, A.; Matsumoto, A.; Takahashi, Y.; Yamada, H. Sinefungin VA and dehydrosinefungin V, new antitrypanosomal antibiotics produced by *Streptomyces* sp. K05-0178. *J. Antibiot. (Tokyo)*. **2010**, *63*, 673–679.
38. Hosoya, Y.; Kameyama, T.; Naganawa, H.; Okami, Y.; Takeuchi, T. Anisomycin and new congeners active against human tumor cell lines. *J. Antibiot. (Tokyo)*. **1993**, *46*, 1300–1302.
39. Khanapure, S.P.; Reddy, R.T.; Biehl, E.R. The preparation of anthraquinones and anthracyclinones via the reaction of haloarenes and cyanophthalides under aryne-forming conditions. *J. Org. Chem.* **1987**, *52*, 5685–5690.
40. Shaaban, K.A.; Shepherd, M.D.; Ahmed, T.A.; Nybo, S.E.; Leggas, M.; Rohr, J. Pyramidamycins AD and 3-hydroxyquinoline-2-carboxamide; cytotoxic benzamides from *Streptomyces* sp. DGC1. *J. Antibiot. (Tokyo)*. **2012**, *65*, 615–622.
41. Omote, Y.; Tazawa, H.; Fujinuma, Y.; Sugiyama, N. Synthesis of 5-Chloro-6-Methoxy-N-Methylisatin. *Bull. Chem. Soc. Jpn.* **1969**, *42*, 3016–3017.
